# Supplementary material
Source: publisher figshare collection journal article supplement (https://gsajournals.figshare.com/ndownloader/files/16995269)
Supplement: Supplementary file 1 [file 16995269]

Exp	NSFTV_ID	Rep	WR	DayOfImaging	PSA
E1	NSFTV_1	1	Control	1	18780
E1	NSFTV_1	1	Control	10	121837
E1	NSFTV_1	1	Control	11	130759
E1	NSFTV_1	1	Control	12	140062
E1	NSFTV_1	1	Control	13	169434
E1	NSFTV_1	1	Control	14	191580
E1	NSFTV_1	1	Control	15	210095
E1	NSFTV_1	1	Control	16	226622
E1	NSFTV_1	1	Control	17	248783
E1	NSFTV_1	1	Control	18	282012
E1	NSFTV_1	1	Control	19	320600
E1	NSFTV_1	1	Control	2	25434
E1	NSFTV_1	1	Control	20	341318
E1	NSFTV_1	1	Control	3	29431
E1	NSFTV_1	1	Control	4	35704
E1	NSFTV_1	1	Control	5	50058
E1	NSFTV_1	1	Control	6	59267
E1	NSFTV_1	1	Control	7	68715
E1	NSFTV_1	1	Control	8	84600
E1	NSFTV_1	1	Control	9	104159
E1	NSFTV_1	1	Low_water	1	21209
E1	NSFTV_1	1	Low_water	10	85915
E1	NSFTV_1	1	Low_water	11	95391
E1	NSFTV_1	1	Low_water	12	100703
E1	NSFTV_1	1	Low_water	13	102837
E1	NSFTV_1	1	Low_water	14	103616
E1	NSFTV_1	1	Low_water	15	106265
E1	NSFTV_1	1	Low_water	16	104779
E1	NSFTV_1	1	Low_water	17	101706
E1	NSFTV_1	1	Low_water	18	106671
E1	NSFTV_1	1	Low_water	19	115525
E1	NSFTV_1	1	Low_water	2	27398
E1	NSFTV_1	1	Low_water	20	133074
E1	NSFTV_1	1	Low_water	3	32449
E1	NSFTV_1	1	Low_water	4	35181
E1	NSFTV_1	1	Low_water	5	43677
E1	NSFTV_1	1	Low_water	6	52223
E1	NSFTV_1	1	Low_water	7	57125
E1	NSFTV_1	1	Low_water	8	67162
E1	NSFTV_1	1	Low_water	9	74754
E1	NSFTV_10	1	Control	1	11300
E1	NSFTV_10	1	Control	10	94297
E1	NSFTV_10	1	Control	11	105727
E1	NSFTV_10	1	Control	12	110089
E1	NSFTV_10	1	Control	13	130144
E1	NSFTV_10	1	Control	14	148258
E1	NSFTV_10	1	Control	15	175932
E1	NSFTV_10	1	Control	16	205451
E1	NSFTV_10	1	Control	17	227291
E1	NSFTV_10	1	Control	18	279314
E1	NSFTV_10	1	Control	19	302634
E1	NSFTV_10	1	Control	2	14315
E1	NSFTV_10	1	Control	20	340673
E1	NSFTV_10	1	Control	3	20166
E1	NSFTV_10	1	Control	4	23061
E1	NSFTV_10	1	Control	5	29552
E1	NSFTV_10	1	Control	6	38808
E1	NSFTV_10	1	Control	7	45678
E1	NSFTV_10	1	Control	8	59699
E1	NSFTV_10	1	Control	9	75294
E1	NSFTV_10	1	Low_water	1	12142
E1	NSFTV_10	1	Low_water	10	44060
E1	NSFTV_10	1	Low_water	11	49611
E1	NSFTV_10	1	Low_water	12	54990
E1	NSFTV_10	1	Low_water	13	58489
E1	NSFTV_10	1	Low_water	14	59555
E1	NSFTV_10	1	Low_water	15	62858
E1	NSFTV_10	1	Low_water	16	64528
E1	NSFTV_10	1	Low_water	17	63474
E1	NSFTV_10	1	Low_water	18	64613
E1	NSFTV_10	1	Low_water	19	64115
E1	NSFTV_10	1	Low_water	2	15056
E1	NSFTV_10	1	Low_water	20	66875
E1	NSFTV_10	1	Low_water	3	16486
E1	NSFTV_10	1	Low_water	4	18224
E1	NSFTV_10	1	Low_water	5	21044
E1	NSFTV_10	1	Low_water	6	26988
E1	NSFTV_10	1	Low_water	7	30501
E1	NSFTV_10	1	Low_water	8	33863
E1	NSFTV_10	1	Low_water	9	37909
E1	NSFTV_101	1	Control	1	12706
E1	NSFTV_101	1	Control	10	87990
E1	NSFTV_101	1	Control	11	110742
E1	NSFTV_101	1	Control	12	136531
E1	NSFTV_101	1	Control	13	157664
E1	NSFTV_101	1	Control	14	172920
E1	NSFTV_101	1	Control	15	209979
E1	NSFTV_101	1	Control	16	239953
E1	NSFTV_101	1	Control	17	293052
E1	NSFTV_101	1	Control	18	345898
E1	NSFTV_101	1	Control	19	373088
E1	NSFTV_101	1	Control	2	15773
E1	NSFTV_101	1	Control	20	417017
E1	NSFTV_101	1	Control	3	20259
E1	NSFTV_101	1	Control	4	25198
E1	NSFTV_101	1	Control	5	30772
E1	NSFTV_101	1	Control	6	38947
E1	NSFTV_101	1	Control	7	49372
E1	NSFTV_101	1	Control	8	62624
E1	NSFTV_101	1	Control	9	70967
E1	NSFTV_101	1	Low_water	1	13943
E1	NSFTV_101	1	Low_water	10	81837
E1	NSFTV_101	1	Low_water	11	99840
E1	NSFTV_101	1	Low_water	12	110791
E1	NSFTV_101	1	Low_water	13	118454
E1	NSFTV_101	1	Low_water	14	122856
E1	NSFTV_101	1	Low_water	15	135821
E1	NSFTV_101	1	Low_water	16	145899
E1	NSFTV_101	1	Low_water	17	154688
E1	NSFTV_101	1	Low_water	18	159911
E1	NSFTV_101	1	Low_water	19	164078
E1	NSFTV_101	1	Low_water	2	17655
E1	NSFTV_101	1	Low_water	20	175374
E1	NSFTV_101	1	Low_water	3	21107
E1	NSFTV_101	1	Low_water	4	24968
E1	NSFTV_101	1	Low_water	5	32487
E1	NSFTV_101	1	Low_water	6	40737
E1	NSFTV_101	1	Low_water	7	50031
E1	NSFTV_101	1	Low_water	8	59948
E1	NSFTV_101	1	Low_water	9	71162
E1	NSFTV_102	1	Control	1	14614
E1	NSFTV_102	1	Control	10	106409
E1	NSFTV_102	1	Control	11	123363
E1	NSFTV_102	1	Control	12	144559
E1	NSFTV_102	1	Control	13	169192
E1	NSFTV_102	1	Control	14	199820
E1	NSFTV_102	1	Control	15	245957
E1	NSFTV_102	1	Control	16	268805
E1	NSFTV_102	1	Control	17	314330
E1	NSFTV_102	1	Control	18	376455
E1	NSFTV_102	1	Control	19	420089
E1	NSFTV_102	1	Control	2	18471
E1	NSFTV_102	1	Control	20	487496
E1	NSFTV_102	1	Control	3	24373
E1	NSFTV_102	1	Control	4	29482
E1	NSFTV_102	1	Control	5	34265
E1	NSFTV_102	1	Control	6	43821
E1	NSFTV_102	1	Control	7	55081
E1	NSFTV_102	1	Control	8	69871
E1	NSFTV_102	1	Control	9	87094
E1	NSFTV_102	1	Low_water	1	14751
E1	NSFTV_102	1	Low_water	10	88816
E1	NSFTV_102	1	Low_water	11	99652
E1	NSFTV_102	1	Low_water	12	116240
E1	NSFTV_102	1	Low_water	13	139061
E1	NSFTV_102	1	Low_water	14	157307
E1	NSFTV_102	1	Low_water	15	173653
E1	NSFTV_102	1	Low_water	16	179984
E1	NSFTV_102	1	Low_water	17	190173
E1	NSFTV_102	1	Low_water	18	202960
E1	NSFTV_102	1	Low_water	19	200672
E1	NSFTV_102	1	Low_water	2	16449
E1	NSFTV_102	1	Low_water	20	204223
E1	NSFTV_102	1	Low_water	3	21895
E1	NSFTV_102	1	Low_water	4	25261
E1	NSFTV_102	1	Low_water	5	30930
E1	NSFTV_102	1	Low_water	6	38019
E1	NSFTV_102	1	Low_water	7	48342
E1	NSFTV_102	1	Low_water	8	61542
E1	NSFTV_102	1	Low_water	9	73933
E1	NSFTV_103	1	Control	1	9726
E1	NSFTV_103	1	Control	10	60694
E1	NSFTV_103	1	Control	11	75383
E1	NSFTV_103	1	Control	12	86307
E1	NSFTV_103	1	Control	13	98283
E1	NSFTV_103	1	Control	14	114586
E1	NSFTV_103	1	Control	15	137918
E1	NSFTV_103	1	Control	16	157261
E1	NSFTV_103	1	Control	17	173358
E1	NSFTV_103	1	Control	18	194794
E1	NSFTV_103	1	Control	19	232940
E1	NSFTV_103	1	Control	2	13338
E1	NSFTV_103	1	Control	20	246824
E1	NSFTV_103	1	Control	3	17619
E1	NSFTV_103	1	Control	4	20275
E1	NSFTV_103	1	Control	5	22373
E1	NSFTV_103	1	Control	6	27403
E1	NSFTV_103	1	Control	7	38441
E1	NSFTV_103	1	Control	8	45187
E1	NSFTV_103	1	Control	9	51453
E1	NSFTV_103	1	Low_water	1	8874
E1	NSFTV_103	1	Low_water	10	39389
E1	NSFTV_103	1	Low_water	11	44748
E1	NSFTV_103	1	Low_water	12	53136
E1	NSFTV_103	1	Low_water	13	62620
E1	NSFTV_103	1	Low_water	14	69441
E1	NSFTV_103	1	Low_water	15	77460
E1	NSFTV_103	1	Low_water	16	81242
E1	NSFTV_103	1	Low_water	17	90073
E1	NSFTV_103	1	Low_water	18	102774
E1	NSFTV_103	1	Low_water	19	106649
E1	NSFTV_103	1	Low_water	2	11117
E1	NSFTV_103	1	Low_water	20	110747
E1	NSFTV_103	1	Low_water	3	14197
E1	NSFTV_103	1	Low_water	4	15562
E1	NSFTV_103	1	Low_water	5	17989
E1	NSFTV_103	1	Low_water	6	22948
E1	NSFTV_103	1	Low_water	7	27077
E1	NSFTV_103	1	Low_water	8	30068
E1	NSFTV_103	1	Low_water	9	35200
E1	NSFTV_104	1	Control	1	12854
E1	NSFTV_104	1	Control	10	117727
E1	NSFTV_104	1	Control	11	146660
E1	NSFTV_104	1	Control	12	167639
E1	NSFTV_104	1	Control	13	192584
E1	NSFTV_104	1	Control	14	237376
E1	NSFTV_104	1	Control	15	294058
E1	NSFTV_104	1	Control	16	334172
E1	NSFTV_104	1	Control	17	373694
E1	NSFTV_104	1	Control	18	428601
E1	NSFTV_104	1	Control	19	501695
E1	NSFTV_104	1	Control	2	15367
E1	NSFTV_104	1	Control	20	565102
E1	NSFTV_104	1	Control	3	20938
E1	NSFTV_104	1	Control	4	27305
E1	NSFTV_104	1	Control	5	33410
E1	NSFTV_104	1	Control	6	43478
E1	NSFTV_104	1	Control	7	57824
E1	NSFTV_104	1	Control	8	70778
E1	NSFTV_104	1	Control	9	86568
E1	NSFTV_104	1	Low_water	1	10024
E1	NSFTV_104	1	Low_water	10	68680
E1	NSFTV_104	1	Low_water	11	85049
E1	NSFTV_104	1	Low_water	12	105918
E1	NSFTV_104	1	Low_water	13	118823
E1	NSFTV_104	1	Low_water	14	129277
E1	NSFTV_104	1	Low_water	15	132335
E1	NSFTV_104	1	Low_water	16	138159
E1	NSFTV_104	1	Low_water	17	147097
E1	NSFTV_104	1	Low_water	18	160386
E1	NSFTV_104	1	Low_water	19	167653
E1	NSFTV_104	1	Low_water	2	11963
E1	NSFTV_104	1	Low_water	20	172431
E1	NSFTV_104	1	Low_water	3	16179
E1	NSFTV_104	1	Low_water	4	19933
E1	NSFTV_104	1	Low_water	5	24091
E1	NSFTV_104	1	Low_water	6	29804
E1	NSFTV_104	1	Low_water	7	40062
E1	NSFTV_104	1	Low_water	8	51278
E1	NSFTV_104	1	Low_water	9	61016
E1	NSFTV_105	1	Control	1	18252
E1	NSFTV_105	1	Control	10	135805
E1	NSFTV_105	1	Control	11	174664
E1	NSFTV_105	1	Control	12	210068
E1	NSFTV_105	1	Control	13	255481
E1	NSFTV_105	1	Control	14	292056
E1	NSFTV_105	1	Control	15	334421
E1	NSFTV_105	1	Control	16	390024
E1	NSFTV_105	1	Control	17	468785
E1	NSFTV_105	1	Control	18	535557
E1	NSFTV_105	1	Control	19	580083
E1	NSFTV_105	1	Control	2	23609
E1	NSFTV_105	1	Control	20	667504
E1	NSFTV_105	1	Control	3	28364
E1	NSFTV_105	1	Control	4	42522
E1	NSFTV_105	1	Control	5	53251
E1	NSFTV_105	1	Control	6	63923
E1	NSFTV_105	1	Control	7	80586
E1	NSFTV_105	1	Control	8	106464
E1	NSFTV_105	1	Control	9	123792
E1	NSFTV_105	1	Low_water	1	22265
E1	NSFTV_105	1	Low_water	10	127640
E1	NSFTV_105	1	Low_water	11	141298
E1	NSFTV_105	1	Low_water	12	153672
E1	NSFTV_105	1	Low_water	13	162554
E1	NSFTV_105	1	Low_water	14	168573
E1	NSFTV_105	1	Low_water	15	170380
E1	NSFTV_105	1	Low_water	16	178235
E1	NSFTV_105	1	Low_water	17	175033
E1	NSFTV_105	1	Low_water	18	185903
E1	NSFTV_105	1	Low_water	19	191158
E1	NSFTV_105	1	Low_water	2	30566
E1	NSFTV_105	1	Low_water	20	212320
E1	NSFTV_105	1	Low_water	3	37373
E1	NSFTV_105	1	Low_water	4	45334
E1	NSFTV_105	1	Low_water	5	62120
E1	NSFTV_105	1	Low_water	6	70520
E1	NSFTV_105	1	Low_water	7	82242
E1	NSFTV_105	1	Low_water	8	96468
E1	NSFTV_105	1	Low_water	9	111318
E1	NSFTV_106	1	Control	1	23376
E1	NSFTV_106	1	Control	10	191459
E1	NSFTV_106	1	Control	11	227072
E1	NSFTV_106	1	Control	12	276492
E1	NSFTV_106	1	Control	13	321229
E1	NSFTV_106	1	Control	14	373825
E1	NSFTV_106	1	Control	15	446062
E1	NSFTV_106	1	Control	16	501071
E1	NSFTV_106	1	Control	17	584393
E1	NSFTV_106	1	Control	18	657481
E1	NSFTV_106	1	Control	19	737777
E1	NSFTV_106	1	Control	2	31790
E1	NSFTV_106	1	Control	20	835892
E1	NSFTV_106	1	Control	3	40383
E1	NSFTV_106	1	Control	4	49719
E1	NSFTV_106	1	Control	5	64740
E1	NSFTV_106	1	Control	6	79680
E1	NSFTV_106	1	Control	7	103271
E1	NSFTV_106	1	Control	8	125808
E1	NSFTV_106	1	Control	9	158579
E1	NSFTV_106	1	Low_water	1	20487
E1	NSFTV_106	1	Low_water	10	138571
E1	NSFTV_106	1	Low_water	11	147113
E1	NSFTV_106	1	Low_water	12	157319
E1	NSFTV_106	1	Low_water	13	168379
E1	NSFTV_106	1	Low_water	14	179004
E1	NSFTV_106	1	Low_water	15	183327
E1	NSFTV_106	1	Low_water	16	172541
E1	NSFTV_106	1	Low_water	17	171716
E1	NSFTV_106	1	Low_water	18	174737
E1	NSFTV_106	1	Low_water	19	186702
E1	NSFTV_106	1	Low_water	2	27962
E1	NSFTV_106	1	Low_water	20	196733
E1	NSFTV_106	1	Low_water	3	36184
E1	NSFTV_106	1	Low_water	4	40801
E1	NSFTV_106	1	Low_water	5	52238
E1	NSFTV_106	1	Low_water	6	65586
E1	NSFTV_106	1	Low_water	7	80490
E1	NSFTV_106	1	Low_water	8	97976
E1	NSFTV_106	1	Low_water	9	122356
E1	NSFTV_107	1	Control	1	20734
E1	NSFTV_107	1	Control	10	140302
E1	NSFTV_107	1	Control	11	155772
E1	NSFTV_107	1	Control	12	169203
E1	NSFTV_107	1	Control	13	217140
E1	NSFTV_107	1	Control	14	249607
E1	NSFTV_107	1	Control	15	273202
E1	NSFTV_107	1	Control	16	305613
E1	NSFTV_107	1	Control	17	340357
E1	NSFTV_107	1	Control	18	393162
E1	NSFTV_107	1	Control	19	390813
E1	NSFTV_107	1	Control	2	23594
E1	NSFTV_107	1	Control	20	439163
E1	NSFTV_107	1	Control	3	31049
E1	NSFTV_107	1	Control	4	36650
E1	NSFTV_107	1	Control	5	50833
E1	NSFTV_107	1	Control	6	68719
E1	NSFTV_107	1	Control	7	79152
E1	NSFTV_107	1	Control	8	97265
E1	NSFTV_107	1	Control	9	118523
E1	NSFTV_107	1	Low_water	1	20997
E1	NSFTV_107	1	Low_water	10	80902
E1	NSFTV_107	1	Low_water	11	84377
E1	NSFTV_107	1	Low_water	12	86474
E1	NSFTV_107	1	Low_water	13	91051
E1	NSFTV_107	1	Low_water	14	88599
E1	NSFTV_107	1	Low_water	15	87824
E1	NSFTV_107	1	Low_water	16	86277
E1	NSFTV_107	1	Low_water	17	86749
E1	NSFTV_107	1	Low_water	18	91653
E1	NSFTV_107	1	Low_water	19	93846
E1	NSFTV_107	1	Low_water	2	24071
E1	NSFTV_107	1	Low_water	20	107248
E1	NSFTV_107	1	Low_water	3	32469
E1	NSFTV_107	1	Low_water	4	37792
E1	NSFTV_107	1	Low_water	5	43873
E1	NSFTV_107	1	Low_water	6	48738
E1	NSFTV_107	1	Low_water	7	56444
E1	NSFTV_107	1	Low_water	8	65313
E1	NSFTV_107	1	Low_water	9	69007
E1	NSFTV_109	1	Control	1	11722
E1	NSFTV_109	1	Control	10	89822
E1	NSFTV_109	1	Control	11	111432
E1	NSFTV_109	1	Control	12	132113
E1	NSFTV_109	1	Control	13	166359
E1	NSFTV_109	1	Control	14	183524
E1	NSFTV_109	1	Control	15	227870
E1	NSFTV_109	1	Control	16	258678
E1	NSFTV_109	1	Control	17	302590
E1	NSFTV_109	1	Control	18	362496
E1	NSFTV_109	1	Control	19	377366
E1	NSFTV_109	1	Control	2	16255
E1	NSFTV_109	1	Control	20	440173
E1	NSFTV_109	1	Control	3	19220
E1	NSFTV_109	1	Control	4	22638
E1	NSFTV_109	1	Control	5	28846
E1	NSFTV_109	1	Control	6	37370
E1	NSFTV_109	1	Control	7	45643
E1	NSFTV_109	1	Control	8	60034
E1	NSFTV_109	1	Control	9	74574
E1	NSFTV_109	1	Low_water	1	10965
E1	NSFTV_109	1	Low_water	10	73164
E1	NSFTV_109	1	Low_water	11	84448
E1	NSFTV_109	1	Low_water	12	95293
E1	NSFTV_109	1	Low_water	13	117358
E1	NSFTV_109	1	Low_water	14	138492
E1	NSFTV_109	1	Low_water	15	151336
E1	NSFTV_109	1	Low_water	16	162546
E1	NSFTV_109	1	Low_water	17	170406
E1	NSFTV_109	1	Low_water	18	193816
E1	NSFTV_109	1	Low_water	19	205378
E1	NSFTV_109	1	Low_water	2	13074
E1	NSFTV_109	1	Low_water	20	224204
E1	NSFTV_109	1	Low_water	3	16712
E1	NSFTV_109	1	Low_water	4	20923
E1	NSFTV_109	1	Low_water	5	24682
E1	NSFTV_109	1	Low_water	6	31587
E1	NSFTV_109	1	Low_water	7	37369
E1	NSFTV_109	1	Low_water	8	47641
E1	NSFTV_109	1	Low_water	9	61373
E1	NSFTV_11	1	Control	1	18274
E1	NSFTV_11	1	Control	10	144474
E1	NSFTV_11	1	Control	11	170186
E1	NSFTV_11	1	Control	12	200412
E1	NSFTV_11	1	Control	13	232606
E1	NSFTV_11	1	Control	14	270897
E1	NSFTV_11	1	Control	15	310472
E1	NSFTV_11	1	Control	16	355156
E1	NSFTV_11	1	Control	17	423833
E1	NSFTV_11	1	Control	18	509189
E1	NSFTV_11	1	Control	19	569906
E1	NSFTV_11	1	Control	2	23831
E1	NSFTV_11	1	Control	20	643872
E1	NSFTV_11	1	Control	3	27730
E1	NSFTV_11	1	Control	4	38657
E1	NSFTV_11	1	Control	5	49352
E1	NSFTV_11	1	Control	6	62014
E1	NSFTV_11	1	Control	7	75957
E1	NSFTV_11	1	Control	8	97097
E1	NSFTV_11	1	Control	9	120273
E1	NSFTV_11	1	Low_water	1	20357
E1	NSFTV_11	1	Low_water	10	124908
E1	NSFTV_11	1	Low_water	11	142988
E1	NSFTV_11	1	Low_water	12	156987
E1	NSFTV_11	1	Low_water	13	172458
E1	NSFTV_11	1	Low_water	14	179815
E1	NSFTV_11	1	Low_water	15	186990
E1	NSFTV_11	1	Low_water	16	189393
E1	NSFTV_11	1	Low_water	17	195792
E1	NSFTV_11	1	Low_water	18	208674
E1	NSFTV_11	1	Low_water	19	220944
E1	NSFTV_11	1	Low_water	2	25615
E1	NSFTV_11	1	Low_water	20	235683
E1	NSFTV_11	1	Low_water	3	32753
E1	NSFTV_11	1	Low_water	4	39348
E1	NSFTV_11	1	Low_water	5	48964
E1	NSFTV_11	1	Low_water	6	61800
E1	NSFTV_11	1	Low_water	7	75578
E1	NSFTV_11	1	Low_water	8	91375
E1	NSFTV_11	1	Low_water	9	107526
E1	NSFTV_112	1	Control	1	11525
E1	NSFTV_112	1	Control	10	98237
E1	NSFTV_112	1	Control	11	119144
E1	NSFTV_112	1	Control	12	144178
E1	NSFTV_112	1	Control	13	161462
E1	NSFTV_112	1	Control	14	206296
E1	NSFTV_112	1	Control	15	247170
E1	NSFTV_112	1	Control	16	274798
E1	NSFTV_112	1	Control	17	321985
E1	NSFTV_112	1	Control	18	367707
E1	NSFTV_112	1	Control	19	410316
E1	NSFTV_112	1	Control	2	14084
E1	NSFTV_112	1	Control	20	464997
E1	NSFTV_112	1	Control	3	19086
E1	NSFTV_112	1	Control	4	25261
E1	NSFTV_112	1	Control	5	32842
E1	NSFTV_112	1	Control	6	38849
E1	NSFTV_112	1	Control	7	52336
E1	NSFTV_112	1	Control	8	70937
E1	NSFTV_112	1	Control	9	84318
E1	NSFTV_112	1	Low_water	1	14755
E1	NSFTV_112	1	Low_water	10	82509
E1	NSFTV_112	1	Low_water	11	89099
E1	NSFTV_112	1	Low_water	12	97231
E1	NSFTV_112	1	Low_water	13	104507
E1	NSFTV_112	1	Low_water	14	118194
E1	NSFTV_112	1	Low_water	15	123842
E1	NSFTV_112	1	Low_water	16	126100
E1	NSFTV_112	1	Low_water	17	128796
E1	NSFTV_112	1	Low_water	18	132193
E1	NSFTV_112	1	Low_water	19	136536
E1	NSFTV_112	1	Low_water	2	17958
E1	NSFTV_112	1	Low_water	20	157057
E1	NSFTV_112	1	Low_water	3	23190
E1	NSFTV_112	1	Low_water	4	28275
E1	NSFTV_112	1	Low_water	5	35754
E1	NSFTV_112	1	Low_water	6	41114
E1	NSFTV_112	1	Low_water	7	47480
E1	NSFTV_112	1	Low_water	8	57852
E1	NSFTV_112	1	Low_water	9	75421
E1	NSFTV_113	1	Control	1	19325
E1	NSFTV_113	1	Control	10	128335
E1	NSFTV_113	1	Control	11	140623
E1	NSFTV_113	1	Control	12	159931
E1	NSFTV_113	1	Control	13	180552
E1	NSFTV_113	1	Control	14	209622
E1	NSFTV_113	1	Control	15	231208
E1	NSFTV_113	1	Control	16	249562
E1	NSFTV_113	1	Control	17	288063
E1	NSFTV_113	1	Control	18	317815
E1	NSFTV_113	1	Control	19	349947
E1	NSFTV_113	1	Control	2	24280
E1	NSFTV_113	1	Control	20	385590
E1	NSFTV_113	1	Control	3	32047
E1	NSFTV_113	1	Control	4	42899
E1	NSFTV_113	1	Control	5	50003
E1	NSFTV_113	1	Control	6	60485
E1	NSFTV_113	1	Control	7	76457
E1	NSFTV_113	1	Control	8	104010
E1	NSFTV_113	1	Control	9	112640
E1	NSFTV_113	1	Low_water	1	21471
E1	NSFTV_113	1	Low_water	10	90194
E1	NSFTV_113	1	Low_water	11	92718
E1	NSFTV_113	1	Low_water	12	91734
E1	NSFTV_113	1	Low_water	13	94036
E1	NSFTV_113	1	Low_water	14	95745
E1	NSFTV_113	1	Low_water	15	102841
E1	NSFTV_113	1	Low_water	16	102525
E1	NSFTV_113	1	Low_water	17	99018
E1	NSFTV_113	1	Low_water	18	103362
E1	NSFTV_113	1	Low_water	19	105623
E1	NSFTV_113	1	Low_water	2	25142
E1	NSFTV_113	1	Low_water	20	115252
E1	NSFTV_113	1	Low_water	3	32658
E1	NSFTV_113	1	Low_water	4	39819
E1	NSFTV_113	1	Low_water	5	48116
E1	NSFTV_113	1	Low_water	6	55130
E1	NSFTV_113	1	Low_water	7	58466
E1	NSFTV_113	1	Low_water	8	77207
E1	NSFTV_113	1	Low_water	9	83072
E1	NSFTV_114	1	Control	1	6617
E1	NSFTV_114	1	Control	10	72047
E1	NSFTV_114	1	Control	11	85591
E1	NSFTV_114	1	Control	12	101396
E1	NSFTV_114	1	Control	13	122776
E1	NSFTV_114	1	Control	14	144005
E1	NSFTV_114	1	Control	15	163392
E1	NSFTV_114	1	Control	16	195037
E1	NSFTV_114	1	Control	17	226271
E1	NSFTV_114	1	Control	18	259114
E1	NSFTV_114	1	Control	19	290939
E1	NSFTV_114	1	Control	2	9008
E1	NSFTV_114	1	Control	20	337702
E1	NSFTV_114	1	Control	3	13230
E1	NSFTV_114	1	Control	4	18751
E1	NSFTV_114	1	Control	5	23772
E1	NSFTV_114	1	Control	6	29617
E1	NSFTV_114	1	Control	7	38746
E1	NSFTV_114	1	Control	8	51061
E1	NSFTV_114	1	Control	9	62536
E1	NSFTV_114	1	Low_water	1	15152
E1	NSFTV_114	1	Low_water	10	83485
E1	NSFTV_114	1	Low_water	11	86871
E1	NSFTV_114	1	Low_water	12	95014
E1	NSFTV_114	1	Low_water	13	98360
E1	NSFTV_114	1	Low_water	14	107444
E1	NSFTV_114	1	Low_water	15	111139
E1	NSFTV_114	1	Low_water	16	113216
E1	NSFTV_114	1	Low_water	17	116290
E1	NSFTV_114	1	Low_water	18	123596
E1	NSFTV_114	1	Low_water	19	130549
E1	NSFTV_114	1	Low_water	2	19026
E1	NSFTV_114	1	Low_water	20	131458
E1	NSFTV_114	1	Low_water	3	25897
E1	NSFTV_114	1	Low_water	4	31991
E1	NSFTV_114	1	Low_water	5	39183
E1	NSFTV_114	1	Low_water	6	46915
E1	NSFTV_114	1	Low_water	7	54251
E1	NSFTV_114	1	Low_water	8	66958
E1	NSFTV_114	1	Low_water	9	78292
E1	NSFTV_116	1	Control	1	15345
E1	NSFTV_116	1	Control	10	110432
E1	NSFTV_116	1	Control	11	122956
E1	NSFTV_116	1	Control	12	139313
E1	NSFTV_116	1	Control	13	167367
E1	NSFTV_116	1	Control	14	174921
E1	NSFTV_116	1	Control	15	197623
E1	NSFTV_116	1	Control	16	236433
E1	NSFTV_116	1	Control	17	273426
E1	NSFTV_116	1	Control	18	313716
E1	NSFTV_116	1	Control	19	355088
E1	NSFTV_116	1	Control	2	20756
E1	NSFTV_116	1	Control	20	386826
E1	NSFTV_116	1	Control	3	28359
E1	NSFTV_116	1	Control	4	33170
E1	NSFTV_116	1	Control	5	40486
E1	NSFTV_116	1	Control	6	50410
E1	NSFTV_116	1	Control	7	62526
E1	NSFTV_116	1	Control	8	71990
E1	NSFTV_116	1	Control	9	89937
E1	NSFTV_116	1	Low_water	1	15423
E1	NSFTV_116	1	Low_water	10	76779
E1	NSFTV_116	1	Low_water	11	80861
E1	NSFTV_116	1	Low_water	12	96304
E1	NSFTV_116	1	Low_water	13	103057
E1	NSFTV_116	1	Low_water	14	109577
E1	NSFTV_116	1	Low_water	15	115065
E1	NSFTV_116	1	Low_water	16	123991
E1	NSFTV_116	1	Low_water	17	128670
E1	NSFTV_116	1	Low_water	18	132765
E1	NSFTV_116	1	Low_water	19	133984
E1	NSFTV_116	1	Low_water	2	20099
E1	NSFTV_116	1	Low_water	20	138371
E1	NSFTV_116	1	Low_water	3	26826
E1	NSFTV_116	1	Low_water	4	30709
E1	NSFTV_116	1	Low_water	5	37151
E1	NSFTV_116	1	Low_water	6	44845
E1	NSFTV_116	1	Low_water	7	54010
E1	NSFTV_116	1	Low_water	8	64131
E1	NSFTV_116	1	Low_water	9	70944
E1	NSFTV_117	1	Control	1	12628
E1	NSFTV_117	1	Control	10	117497
E1	NSFTV_117	1	Control	11	151887
E1	NSFTV_117	1	Control	12	184930
E1	NSFTV_117	1	Control	13	208326
E1	NSFTV_117	1	Control	14	241820
E1	NSFTV_117	1	Control	15	289625
E1	NSFTV_117	1	Control	16	329910
E1	NSFTV_117	1	Control	17	396280
E1	NSFTV_117	1	Control	18	471569
E1	NSFTV_117	1	Control	19	559634
E1	NSFTV_117	1	Control	2	16796
E1	NSFTV_117	1	Control	20	646501
E1	NSFTV_117	1	Control	3	20317
E1	NSFTV_117	1	Control	4	28083
E1	NSFTV_117	1	Control	5	37417
E1	NSFTV_117	1	Control	6	45033
E1	NSFTV_117	1	Control	7	59661
E1	NSFTV_117	1	Control	8	80887
E1	NSFTV_117	1	Control	9	96017
E1	NSFTV_117	1	Low_water	1	12869
E1	NSFTV_117	1	Low_water	10	97744
E1	NSFTV_117	1	Low_water	11	112911
E1	NSFTV_117	1	Low_water	12	131559
E1	NSFTV_117	1	Low_water	13	153072
E1	NSFTV_117	1	Low_water	14	173473
E1	NSFTV_117	1	Low_water	15	184252
E1	NSFTV_117	1	Low_water	16	194898
E1	NSFTV_117	1	Low_water	17	197601
E1	NSFTV_117	1	Low_water	18	189058
E1	NSFTV_117	1	Low_water	19	195142
E1	NSFTV_117	1	Low_water	2	16063
E1	NSFTV_117	1	Low_water	20	204410
E1	NSFTV_117	1	Low_water	3	19780
E1	NSFTV_117	1	Low_water	4	27163
E1	NSFTV_117	1	Low_water	5	34511
E1	NSFTV_117	1	Low_water	6	42008
E1	NSFTV_117	1	Low_water	7	54826
E1	NSFTV_117	1	Low_water	8	72256
E1	NSFTV_117	1	Low_water	9	86698
E1	NSFTV_118	1	Control	1	11344
E1	NSFTV_118	1	Control	10	75109
E1	NSFTV_118	1	Control	11	85909
E1	NSFTV_118	1	Control	12	105914
E1	NSFTV_118	1	Control	13	131640
E1	NSFTV_118	1	Control	14	148445
E1	NSFTV_118	1	Control	15	164000
E1	NSFTV_118	1	Control	16	203935
E1	NSFTV_118	1	Control	17	252949
E1	NSFTV_118	1	Control	18	289406
E1	NSFTV_118	1	Control	19	314147
E1	NSFTV_118	1	Control	2	13919
E1	NSFTV_118	1	Control	20	345296
E1	NSFTV_118	1	Control	3	20030
E1	NSFTV_118	1	Control	4	24300
E1	NSFTV_118	1	Control	5	31088
E1	NSFTV_118	1	Control	6	37774
E1	NSFTV_118	1	Control	7	47952
E1	NSFTV_118	1	Control	8	61327
E1	NSFTV_118	1	Control	9	64153
E1	NSFTV_118	1	Low_water	1	13327
E1	NSFTV_118	1	Low_water	10	83724
E1	NSFTV_118	1	Low_water	11	92301
E1	NSFTV_118	1	Low_water	12	104931
E1	NSFTV_118	1	Low_water	13	120733
E1	NSFTV_118	1	Low_water	14	134904
E1	NSFTV_118	1	Low_water	15	140841
E1	NSFTV_118	1	Low_water	16	151245
E1	NSFTV_118	1	Low_water	17	153801
E1	NSFTV_118	1	Low_water	18	155860
E1	NSFTV_118	1	Low_water	19	156819
E1	NSFTV_118	1	Low_water	2	15339
E1	NSFTV_118	1	Low_water	20	162806
E1	NSFTV_118	1	Low_water	3	23118
E1	NSFTV_118	1	Low_water	4	28918
E1	NSFTV_118	1	Low_water	5	35196
E1	NSFTV_118	1	Low_water	6	39809
E1	NSFTV_118	1	Low_water	7	48506
E1	NSFTV_118	1	Low_water	8	62114
E1	NSFTV_118	1	Low_water	9	74817
E1	NSFTV_120	1	Control	1	12213
E1	NSFTV_120	1	Control	10	103355
E1	NSFTV_120	1	Control	11	125278
E1	NSFTV_120	1	Control	12	147912
E1	NSFTV_120	1	Control	13	179481
E1	NSFTV_120	1	Control	14	208180
E1	NSFTV_120	1	Control	15	254307
E1	NSFTV_120	1	Control	16	285422
E1	NSFTV_120	1	Control	17	308675
E1	NSFTV_120	1	Control	18	397287
E1	NSFTV_120	1	Control	19	464603
E1	NSFTV_120	1	Control	2	16913
E1	NSFTV_120	1	Control	20	539839
E1	NSFTV_120	1	Control	3	20592
E1	NSFTV_120	1	Control	4	25837
E1	NSFTV_120	1	Control	5	32242
E1	NSFTV_120	1	Control	6	40701
E1	NSFTV_120	1	Control	7	48304
E1	NSFTV_120	1	Control	8	66319
E1	NSFTV_120	1	Control	9	82088
E1	NSFTV_120	1	Low_water	1	14600
E1	NSFTV_120	1	Low_water	10	93617
E1	NSFTV_120	1	Low_water	11	117327
E1	NSFTV_120	1	Low_water	12	129084
E1	NSFTV_120	1	Low_water	13	143795
E1	NSFTV_120	1	Low_water	14	160944
E1	NSFTV_120	1	Low_water	15	176134
E1	NSFTV_120	1	Low_water	16	185979
E1	NSFTV_120	1	Low_water	17	185641
E1	NSFTV_120	1	Low_water	18	194691
E1	NSFTV_120	1	Low_water	19	213145
E1	NSFTV_120	1	Low_water	2	18355
E1	NSFTV_120	1	Low_water	20	233872
E1	NSFTV_120	1	Low_water	3	24605
E1	NSFTV_120	1	Low_water	4	30503
E1	NSFTV_120	1	Low_water	5	37014
E1	NSFTV_120	1	Low_water	6	48384
E1	NSFTV_120	1	Low_water	7	59099
E1	NSFTV_120	1	Low_water	8	70942
E1	NSFTV_120	1	Low_water	9	76998
E1	NSFTV_121	1	Control	1	13080
E1	NSFTV_121	1	Control	10	83121
E1	NSFTV_121	1	Control	11	104097
E1	NSFTV_121	1	Control	12	129846
E1	NSFTV_121	1	Control	13	149310
E1	NSFTV_121	1	Control	14	167419
E1	NSFTV_121	1	Control	15	201006
E1	NSFTV_121	1	Control	16	243249
E1	NSFTV_121	1	Control	17	276739
E1	NSFTV_121	1	Control	18	333068
E1	NSFTV_121	1	Control	19	376608
E1	NSFTV_121	1	Control	2	14505
E1	NSFTV_121	1	Control	20	424190
E1	NSFTV_121	1	Control	3	19114
E1	NSFTV_121	1	Control	4	24501
E1	NSFTV_121	1	Control	5	29404
E1	NSFTV_121	1	Control	6	35464
E1	NSFTV_121	1	Control	7	43882
E1	NSFTV_121	1	Control	8	60032
E1	NSFTV_121	1	Control	9	70782
E1	NSFTV_121	1	Low_water	1	11454
E1	NSFTV_121	1	Low_water	10	64025
E1	NSFTV_121	1	Low_water	11	73083
E1	NSFTV_121	1	Low_water	12	88818
E1	NSFTV_121	1	Low_water	13	104693
E1	NSFTV_121	1	Low_water	14	126722
E1	NSFTV_121	1	Low_water	15	137236
E1	NSFTV_121	1	Low_water	16	148572
E1	NSFTV_121	1	Low_water	17	156650
E1	NSFTV_121	1	Low_water	18	189424
E1	NSFTV_121	1	Low_water	19	208848
E1	NSFTV_121	1	Low_water	2	14537
E1	NSFTV_121	1	Low_water	20	228666
E1	NSFTV_121	1	Low_water	3	19075
E1	NSFTV_121	1	Low_water	4	23556
E1	NSFTV_121	1	Low_water	5	27446
E1	NSFTV_121	1	Low_water	6	32303
E1	NSFTV_121	1	Low_water	7	40155
E1	NSFTV_121	1	Low_water	8	50046
E1	NSFTV_121	1	Low_water	9	60207
E1	NSFTV_122	1	Control	1	19045
E1	NSFTV_122	1	Control	10	147957
E1	NSFTV_122	1	Control	11	186792
E1	NSFTV_122	1	Control	12	209637
E1	NSFTV_122	1	Control	13	248123
E1	NSFTV_122	1	Control	14	292047
E1	NSFTV_122	1	Control	15	343985
E1	NSFTV_122	1	Control	16	385200
E1	NSFTV_122	1	Control	17	410329
E1	NSFTV_122	1	Control	18	471765
E1	NSFTV_122	1	Control	19	521375
E1	NSFTV_122	1	Control	2	23621
E1	NSFTV_122	1	Control	20	586295
E1	NSFTV_122	1	Control	3	35909
E1	NSFTV_122	1	Control	4	40972
E1	NSFTV_122	1	Control	5	47194
E1	NSFTV_122	1	Control	6	63975
E1	NSFTV_122	1	Control	7	81277
E1	NSFTV_122	1	Control	8	98614
E1	NSFTV_122	1	Control	9	121510
E1	NSFTV_122	1	Low_water	1	17226
E1	NSFTV_122	1	Low_water	10	69957
E1	NSFTV_122	1	Low_water	11	72035
E1	NSFTV_122	1	Low_water	12	75973
E1	NSFTV_122	1	Low_water	13	79430
E1	NSFTV_122	1	Low_water	14	82371
E1	NSFTV_122	1	Low_water	15	89767
E1	NSFTV_122	1	Low_water	16	90604
E1	NSFTV_122	1	Low_water	17	94506
E1	NSFTV_122	1	Low_water	18	95448
E1	NSFTV_122	1	Low_water	19	98204
E1	NSFTV_122	1	Low_water	2	18428
E1	NSFTV_122	1	Low_water	20	110156
E1	NSFTV_122	1	Low_water	3	22524
E1	NSFTV_122	1	Low_water	4	27432
E1	NSFTV_122	1	Low_water	5	34390
E1	NSFTV_122	1	Low_water	6	35297
E1	NSFTV_122	1	Low_water	7	40269
E1	NSFTV_122	1	Low_water	8	52045
E1	NSFTV_122	1	Low_water	9	63231
E1	NSFTV_123	1	Control	1	20261
E1	NSFTV_123	1	Control	10	132624
E1	NSFTV_123	1	Control	11	159820
E1	NSFTV_123	1	Control	12	190633
E1	NSFTV_123	1	Control	13	221378
E1	NSFTV_123	1	Control	14	258409
E1	NSFTV_123	1	Control	15	290733
E1	NSFTV_123	1	Control	16	327750
E1	NSFTV_123	1	Control	17	379344
E1	NSFTV_123	1	Control	18	424021
E1	NSFTV_123	1	Control	19	473173
E1	NSFTV_123	1	Control	2	26183
E1	NSFTV_123	1	Control	20	531782
E1	NSFTV_123	1	Control	3	32999
E1	NSFTV_123	1	Control	4	41306
E1	NSFTV_123	1	Control	5	55245
E1	NSFTV_123	1	Control	6	68719
E1	NSFTV_123	1	Control	7	80632
E1	NSFTV_123	1	Control	8	92200
E1	NSFTV_123	1	Control	9	116140
E1	NSFTV_123	1	Low_water	1	21067
E1	NSFTV_123	1	Low_water	10	109383
E1	NSFTV_123	1	Low_water	11	119161
E1	NSFTV_123	1	Low_water	12	129002
E1	NSFTV_123	1	Low_water	13	138452
E1	NSFTV_123	1	Low_water	14	147522
E1	NSFTV_123	1	Low_water	15	156568
E1	NSFTV_123	1	Low_water	16	155534
E1	NSFTV_123	1	Low_water	17	161535
E1	NSFTV_123	1	Low_water	18	172086
E1	NSFTV_123	1	Low_water	19	182597
E1	NSFTV_123	1	Low_water	2	28594
E1	NSFTV_123	1	Low_water	20	201799
E1	NSFTV_123	1	Low_water	3	35606
E1	NSFTV_123	1	Low_water	4	41773
E1	NSFTV_123	1	Low_water	5	51824
E1	NSFTV_123	1	Low_water	6	64261
E1	NSFTV_123	1	Low_water	7	75817
E1	NSFTV_123	1	Low_water	8	84609
E1	NSFTV_123	1	Low_water	9	97823
E1	NSFTV_124	1	Control	1	8190
E1	NSFTV_124	1	Control	10	88544
E1	NSFTV_124	1	Control	11	111326
E1	NSFTV_124	1	Control	12	131786
E1	NSFTV_124	1	Control	13	155139
E1	NSFTV_124	1	Control	14	185660
E1	NSFTV_124	1	Control	15	223128
E1	NSFTV_124	1	Control	16	257996
E1	NSFTV_124	1	Control	17	314827
E1	NSFTV_124	1	Control	18	392589
E1	NSFTV_124	1	Control	19	440060
E1	NSFTV_124	1	Control	2	10877
E1	NSFTV_124	1	Control	20	501012
E1	NSFTV_124	1	Control	3	14244
E1	NSFTV_124	1	Control	4	18283
E1	NSFTV_124	1	Control	5	24515
E1	NSFTV_124	1	Control	6	30764
E1	NSFTV_124	1	Control	7	39586
E1	NSFTV_124	1	Control	8	56256
E1	NSFTV_124	1	Control	9	73632
E1	NSFTV_124	1	Low_water	1	7926
E1	NSFTV_124	1	Low_water	10	66283
E1	NSFTV_124	1	Low_water	11	82217
E1	NSFTV_124	1	Low_water	12	99709
E1	NSFTV_124	1	Low_water	13	117506
E1	NSFTV_124	1	Low_water	14	131680
E1	NSFTV_124	1	Low_water	15	148206
E1	NSFTV_124	1	Low_water	16	158837
E1	NSFTV_124	1	Low_water	17	169495
E1	NSFTV_124	1	Low_water	18	181221
E1	NSFTV_124	1	Low_water	19	193593
E1	NSFTV_124	1	Low_water	2	10665
E1	NSFTV_124	1	Low_water	20	199793
E1	NSFTV_124	1	Low_water	3	13500
E1	NSFTV_124	1	Low_water	4	17336
E1	NSFTV_124	1	Low_water	5	20928
E1	NSFTV_124	1	Low_water	6	26841
E1	NSFTV_124	1	Low_water	7	34102
E1	NSFTV_124	1	Low_water	8	44883
E1	NSFTV_124	1	Low_water	9	56795
E1	NSFTV_125	1	Control	1	30159
E1	NSFTV_125	1	Control	10	176212
E1	NSFTV_125	1	Control	11	198656
E1	NSFTV_125	1	Control	12	230480
E1	NSFTV_125	1	Control	13	267210
E1	NSFTV_125	1	Control	14	302691
E1	NSFTV_125	1	Control	15	345282
E1	NSFTV_125	1	Control	16	386200
E1	NSFTV_125	1	Control	17	438258
E1	NSFTV_125	1	Control	18	498206
E1	NSFTV_125	1	Control	19	527946
E1	NSFTV_125	1	Control	2	38893
E1	NSFTV_125	1	Control	20	583378
E1	NSFTV_125	1	Control	3	47828
E1	NSFTV_125	1	Control	4	62401
E1	NSFTV_125	1	Control	5	74350
E1	NSFTV_125	1	Control	6	94791
E1	NSFTV_125	1	Control	7	114239
E1	NSFTV_125	1	Control	8	136444
E1	NSFTV_125	1	Control	9	158493
E1	NSFTV_125	1	Low_water	1	25582
E1	NSFTV_125	1	Low_water	10	124617
E1	NSFTV_125	1	Low_water	11	133435
E1	NSFTV_125	1	Low_water	12	136581
E1	NSFTV_125	1	Low_water	13	138519
E1	NSFTV_125	1	Low_water	14	137996
E1	NSFTV_125	1	Low_water	15	136653
E1	NSFTV_125	1	Low_water	16	133349
E1	NSFTV_125	1	Low_water	17	135052
E1	NSFTV_125	1	Low_water	18	142971
E1	NSFTV_125	1	Low_water	19	145238
E1	NSFTV_125	1	Low_water	2	28697
E1	NSFTV_125	1	Low_water	20	164941
E1	NSFTV_125	1	Low_water	3	33684
E1	NSFTV_125	1	Low_water	4	43723
E1	NSFTV_125	1	Low_water	5	59668
E1	NSFTV_125	1	Low_water	6	67581
E1	NSFTV_125	1	Low_water	7	81147
E1	NSFTV_125	1	Low_water	8	95508
E1	NSFTV_125	1	Low_water	9	111630
E1	NSFTV_128	1	Control	1	12092
E1	NSFTV_128	1	Control	10	78302
E1	NSFTV_128	1	Control	11	94894
E1	NSFTV_128	1	Control	12	115177
E1	NSFTV_128	1	Control	13	130124
E1	NSFTV_128	1	Control	14	144599
E1	NSFTV_128	1	Control	15	151371
E1	NSFTV_128	1	Control	16	178556
E1	NSFTV_128	1	Control	17	173603
E1	NSFTV_128	1	Control	18	207465
E1	NSFTV_128	1	Control	19	234835
E1	NSFTV_128	1	Control	2	14095
E1	NSFTV_128	1	Control	20	284230
E1	NSFTV_128	1	Control	3	16873
E1	NSFTV_128	1	Control	4	22569
E1	NSFTV_128	1	Control	5	28189
E1	NSFTV_128	1	Control	6	33070
E1	NSFTV_128	1	Control	7	43892
E1	NSFTV_128	1	Control	8	57120
E1	NSFTV_128	1	Control	9	67071
E1	NSFTV_128	1	Low_water	1	17435
E1	NSFTV_128	1	Low_water	10	61983
E1	NSFTV_128	1	Low_water	11	66471
E1	NSFTV_128	1	Low_water	12	72709
E1	NSFTV_128	1	Low_water	13	77791
E1	NSFTV_128	1	Low_water	14	79113
E1	NSFTV_128	1	Low_water	15	79639
E1	NSFTV_128	1	Low_water	16	78859
E1	NSFTV_128	1	Low_water	17	80044
E1	NSFTV_128	1	Low_water	18	84375
E1	NSFTV_128	1	Low_water	19	88363
E1	NSFTV_128	1	Low_water	2	18522
E1	NSFTV_128	1	Low_water	20	95689
E1	NSFTV_128	1	Low_water	3	22192
E1	NSFTV_128	1	Low_water	4	27695
E1	NSFTV_128	1	Low_water	5	32037
E1	NSFTV_128	1	Low_water	6	35243
E1	NSFTV_128	1	Low_water	7	40667
E1	NSFTV_128	1	Low_water	8	49304
E1	NSFTV_128	1	Low_water	9	57743
E1	NSFTV_129	1	Control	1	14220
E1	NSFTV_129	1	Control	10	112108
E1	NSFTV_129	1	Control	11	126959
E1	NSFTV_129	1	Control	12	147604
E1	NSFTV_129	1	Control	13	174087
E1	NSFTV_129	1	Control	14	205649
E1	NSFTV_129	1	Control	15	233884
E1	NSFTV_129	1	Control	16	253711
E1	NSFTV_129	1	Control	17	284931
E1	NSFTV_129	1	Control	18	330350
E1	NSFTV_129	1	Control	19	378208
E1	NSFTV_129	1	Control	2	22681
E1	NSFTV_129	1	Control	20	411984
E1	NSFTV_129	1	Control	3	28200
E1	NSFTV_129	1	Control	4	37741
E1	NSFTV_129	1	Control	5	48082
E1	NSFTV_129	1	Control	6	55587
E1	NSFTV_129	1	Control	7	62863
E1	NSFTV_129	1	Control	8	73876
E1	NSFTV_129	1	Control	9	94878
E1	NSFTV_129	1	Low_water	1	21683
E1	NSFTV_129	1	Low_water	10	107509
E1	NSFTV_129	1	Low_water	11	117655
E1	NSFTV_129	1	Low_water	12	121273
E1	NSFTV_129	1	Low_water	13	122804
E1	NSFTV_129	1	Low_water	14	127591
E1	NSFTV_129	1	Low_water	15	130248
E1	NSFTV_129	1	Low_water	16	128607
E1	NSFTV_129	1	Low_water	17	124753
E1	NSFTV_129	1	Low_water	18	136398
E1	NSFTV_129	1	Low_water	19	141039
E1	NSFTV_129	1	Low_water	2	27933
E1	NSFTV_129	1	Low_water	20	147219
E1	NSFTV_129	1	Low_water	3	35117
E1	NSFTV_129	1	Low_water	4	41648
E1	NSFTV_129	1	Low_water	5	51893
E1	NSFTV_129	1	Low_water	6	59925
E1	NSFTV_129	1	Low_water	7	70556
E1	NSFTV_129	1	Low_water	8	82452
E1	NSFTV_129	1	Low_water	9	94545
E1	NSFTV_13	1	Control	1	15097
E1	NSFTV_13	1	Control	10	106532
E1	NSFTV_13	1	Control	11	123841
E1	NSFTV_13	1	Control	12	145610
E1	NSFTV_13	1	Control	13	174807
E1	NSFTV_13	1	Control	14	205569
E1	NSFTV_13	1	Control	15	237731
E1	NSFTV_13	1	Control	16	265246
E1	NSFTV_13	1	Control	17	300809
E1	NSFTV_13	1	Control	18	344283
E1	NSFTV_13	1	Control	19	383220
E1	NSFTV_13	1	Control	2	19195
E1	NSFTV_13	1	Control	20	427796
E1	NSFTV_13	1	Control	3	26962
E1	NSFTV_13	1	Control	4	32131
E1	NSFTV_13	1	Control	5	37858
E1	NSFTV_13	1	Control	6	47046
E1	NSFTV_13	1	Control	7	57047
E1	NSFTV_13	1	Control	8	65137
E1	NSFTV_13	1	Control	9	82159
E1	NSFTV_13	1	Low_water	1	15736
E1	NSFTV_13	1	Low_water	10	98535
E1	NSFTV_13	1	Low_water	11	118301
E1	NSFTV_13	1	Low_water	12	126313
E1	NSFTV_13	1	Low_water	13	147065
E1	NSFTV_13	1	Low_water	14	160163
E1	NSFTV_13	1	Low_water	15	171020
E1	NSFTV_13	1	Low_water	16	175579
E1	NSFTV_13	1	Low_water	17	177410
E1	NSFTV_13	1	Low_water	18	183689
E1	NSFTV_13	1	Low_water	19	185875
E1	NSFTV_13	1	Low_water	2	19520
E1	NSFTV_13	1	Low_water	20	191551
E1	NSFTV_13	1	Low_water	3	27488
E1	NSFTV_13	1	Low_water	4	33955
E1	NSFTV_13	1	Low_water	5	42775
E1	NSFTV_13	1	Low_water	6	53941
E1	NSFTV_13	1	Low_water	7	63154
E1	NSFTV_13	1	Low_water	8	72998
E1	NSFTV_13	1	Low_water	9	85572
E1	NSFTV_130	1	Control	1	11415
E1	NSFTV_130	1	Control	10	84458
E1	NSFTV_130	1	Control	11	107605
E1	NSFTV_130	1	Control	12	124514
E1	NSFTV_130	1	Control	13	139543
E1	NSFTV_130	1	Control	14	160181
E1	NSFTV_130	1	Control	15	195194
E1	NSFTV_130	1	Control	16	219195
E1	NSFTV_130	1	Control	17	245333
E1	NSFTV_130	1	Control	18	285451
E1	NSFTV_130	1	Control	19	318118
E1	NSFTV_130	1	Control	2	14736
E1	NSFTV_130	1	Control	20	354088
E1	NSFTV_130	1	Control	3	20344
E1	NSFTV_130	1	Control	4	24931
E1	NSFTV_130	1	Control	5	31483
E1	NSFTV_130	1	Control	6	40125
E1	NSFTV_130	1	Control	7	49662
E1	NSFTV_130	1	Control	8	62879
E1	NSFTV_130	1	Control	9	73020
E1	NSFTV_130	1	Low_water	1	13150
E1	NSFTV_130	1	Low_water	10	77946
E1	NSFTV_130	1	Low_water	11	93644
E1	NSFTV_130	1	Low_water	12	109327
E1	NSFTV_130	1	Low_water	13	129297
E1	NSFTV_130	1	Low_water	14	142514
E1	NSFTV_130	1	Low_water	15	155817
E1	NSFTV_130	1	Low_water	16	169104
E1	NSFTV_130	1	Low_water	17	180805
E1	NSFTV_130	1	Low_water	18	190336
E1	NSFTV_130	1	Low_water	19	192999
E1	NSFTV_130	1	Low_water	2	16797
E1	NSFTV_130	1	Low_water	20	199197
E1	NSFTV_130	1	Low_water	3	21041
E1	NSFTV_130	1	Low_water	4	26259
E1	NSFTV_130	1	Low_water	5	33845
E1	NSFTV_130	1	Low_water	6	40605
E1	NSFTV_130	1	Low_water	7	47496
E1	NSFTV_130	1	Low_water	8	59684
E1	NSFTV_130	1	Low_water	9	69710
E1	NSFTV_131	1	Control	1	23136
E1	NSFTV_131	1	Control	10	176876
E1	NSFTV_131	1	Control	11	204671
E1	NSFTV_131	1	Control	12	238950
E1	NSFTV_131	1	Control	13	276591
E1	NSFTV_131	1	Control	14	328558
E1	NSFTV_131	1	Control	15	392108
E1	NSFTV_131	1	Control	16	442495
E1	NSFTV_131	1	Control	17	521246
E1	NSFTV_131	1	Control	18	593694
E1	NSFTV_131	1	Control	19	663435
E1	NSFTV_131	1	Control	2	27371
E1	NSFTV_131	1	Control	20	780595
E1	NSFTV_131	1	Control	3	36273
E1	NSFTV_131	1	Control	4	50863
E1	NSFTV_131	1	Control	5	61957
E1	NSFTV_131	1	Control	6	76777
E1	NSFTV_131	1	Control	7	96488
E1	NSFTV_131	1	Control	8	123836
E1	NSFTV_131	1	Control	9	146825
E1	NSFTV_131	1	Low_water	1	22073
E1	NSFTV_131	1	Low_water	10	109694
E1	NSFTV_131	1	Low_water	11	116172
E1	NSFTV_131	1	Low_water	12	126986
E1	NSFTV_131	1	Low_water	13	134185
E1	NSFTV_131	1	Low_water	14	137827
E1	NSFTV_131	1	Low_water	15	149351
E1	NSFTV_131	1	Low_water	16	146958
E1	NSFTV_131	1	Low_water	17	149834
E1	NSFTV_131	1	Low_water	18	167958
E1	NSFTV_131	1	Low_water	19	168316
E1	NSFTV_131	1	Low_water	2	26854
E1	NSFTV_131	1	Low_water	20	192738
E1	NSFTV_131	1	Low_water	3	33656
E1	NSFTV_131	1	Low_water	4	46325
E1	NSFTV_131	1	Low_water	5	56148
E1	NSFTV_131	1	Low_water	6	60614
E1	NSFTV_131	1	Low_water	7	76334
E1	NSFTV_131	1	Low_water	8	94302
E1	NSFTV_131	1	Low_water	9	106131
E1	NSFTV_132	1	Control	1	14198
E1	NSFTV_132	1	Control	10	140874
E1	NSFTV_132	1	Control	11	153856
E1	NSFTV_132	1	Control	12	184322
E1	NSFTV_132	1	Control	13	216649
E1	NSFTV_132	1	Control	14	257411
E1	NSFTV_132	1	Control	15	308652
E1	NSFTV_132	1	Control	16	347366
E1	NSFTV_132	1	Control	17	407412
E1	NSFTV_132	1	Control	18	470691
E1	NSFTV_132	1	Control	19	534066
E1	NSFTV_132	1	Control	2	18102
E1	NSFTV_132	1	Control	20	625648
E1	NSFTV_132	1	Control	3	26289
E1	NSFTV_132	1	Control	4	32933
E1	NSFTV_132	1	Control	5	40201
E1	NSFTV_132	1	Control	6	52828
E1	NSFTV_132	1	Control	7	65122
E1	NSFTV_132	1	Control	8	85132
E1	NSFTV_132	1	Control	9	109424
E1	NSFTV_132	1	Low_water	1	13984
E1	NSFTV_132	1	Low_water	10	97077
E1	NSFTV_132	1	Low_water	11	107752
E1	NSFTV_132	1	Low_water	12	126193
E1	NSFTV_132	1	Low_water	13	139729
E1	NSFTV_132	1	Low_water	14	147568
E1	NSFTV_132	1	Low_water	15	153068
E1	NSFTV_132	1	Low_water	16	159070
E1	NSFTV_132	1	Low_water	17	162102
E1	NSFTV_132	1	Low_water	18	160473
E1	NSFTV_132	1	Low_water	19	158959
E1	NSFTV_132	1	Low_water	2	18498
E1	NSFTV_132	1	Low_water	20	161923
E1	NSFTV_132	1	Low_water	3	24077
E1	NSFTV_132	1	Low_water	4	29383
E1	NSFTV_132	1	Low_water	5	36997
E1	NSFTV_132	1	Low_water	6	43535
E1	NSFTV_132	1	Low_water	7	56195
E1	NSFTV_132	1	Low_water	8	72398
E1	NSFTV_132	1	Low_water	9	86629
E1	NSFTV_133	1	Control	1	14361
E1	NSFTV_133	1	Control	10	119000
E1	NSFTV_133	1	Control	11	126995
E1	NSFTV_133	1	Control	12	150675
E1	NSFTV_133	1	Control	13	182915
E1	NSFTV_133	1	Control	14	230105
E1	NSFTV_133	1	Control	15	263984
E1	NSFTV_133	1	Control	16	303970
E1	NSFTV_133	1	Control	17	357874
E1	NSFTV_133	1	Control	18	416486
E1	NSFTV_133	1	Control	19	466991
E1	NSFTV_133	1	Control	2	17986
E1	NSFTV_133	1	Control	20	523335
E1	NSFTV_133	1	Control	3	23214
E1	NSFTV_133	1	Control	4	30292
E1	NSFTV_133	1	Control	5	38536
E1	NSFTV_133	1	Control	6	50234
E1	NSFTV_133	1	Control	7	58353
E1	NSFTV_133	1	Control	8	74621
E1	NSFTV_133	1	Control	9	95389
E1	NSFTV_133	1	Low_water	1	14519
E1	NSFTV_133	1	Low_water	10	87051
E1	NSFTV_133	1	Low_water	11	101690
E1	NSFTV_133	1	Low_water	12	107862
E1	NSFTV_133	1	Low_water	13	112088
E1	NSFTV_133	1	Low_water	14	114424
E1	NSFTV_133	1	Low_water	15	121705
E1	NSFTV_133	1	Low_water	16	124208
E1	NSFTV_133	1	Low_water	17	126642
E1	NSFTV_133	1	Low_water	18	126720
E1	NSFTV_133	1	Low_water	19	125620
E1	NSFTV_133	1	Low_water	2	18730
E1	NSFTV_133	1	Low_water	20	130949
E1	NSFTV_133	1	Low_water	3	22379
E1	NSFTV_133	1	Low_water	4	27298
E1	NSFTV_133	1	Low_water	5	37083
E1	NSFTV_133	1	Low_water	6	45582
E1	NSFTV_133	1	Low_water	7	49688
E1	NSFTV_133	1	Low_water	8	63254
E1	NSFTV_133	1	Low_water	9	74206
E1	NSFTV_134	1	Control	1	18754
E1	NSFTV_134	1	Control	10	121405
E1	NSFTV_134	1	Control	11	135742
E1	NSFTV_134	1	Control	12	154601
E1	NSFTV_134	1	Control	13	191429
E1	NSFTV_134	1	Control	14	228227
E1	NSFTV_134	1	Control	15	242352
E1	NSFTV_134	1	Control	16	272852
E1	NSFTV_134	1	Control	17	326791
E1	NSFTV_134	1	Control	18	379254
E1	NSFTV_134	1	Control	19	419422
E1	NSFTV_134	1	Control	2	24283
E1	NSFTV_134	1	Control	20	475180
E1	NSFTV_134	1	Control	3	27988
E1	NSFTV_134	1	Control	4	33480
E1	NSFTV_134	1	Control	5	42458
E1	NSFTV_134	1	Control	6	50906
E1	NSFTV_134	1	Control	7	62440
E1	NSFTV_134	1	Control	8	85921
E1	NSFTV_134	1	Control	9	100294
E1	NSFTV_134	1	Low_water	1	17968
E1	NSFTV_134	1	Low_water	10	57486
E1	NSFTV_134	1	Low_water	11	60892
E1	NSFTV_134	1	Low_water	12	68341
E1	NSFTV_134	1	Low_water	13	76126
E1	NSFTV_134	1	Low_water	14	79869
E1	NSFTV_134	1	Low_water	15	79385
E1	NSFTV_134	1	Low_water	16	80319
E1	NSFTV_134	1	Low_water	17	80966
E1	NSFTV_134	1	Low_water	18	83213
E1	NSFTV_134	1	Low_water	19	79978
E1	NSFTV_134	1	Low_water	2	19914
E1	NSFTV_134	1	Low_water	20	83916
E1	NSFTV_134	1	Low_water	3	23313
E1	NSFTV_134	1	Low_water	4	26315
E1	NSFTV_134	1	Low_water	5	32378
E1	NSFTV_134	1	Low_water	6	37201
E1	NSFTV_134	1	Low_water	7	41678
E1	NSFTV_134	1	Low_water	8	43837
E1	NSFTV_134	1	Low_water	9	50286
E1	NSFTV_135	1	Control	1	14934
E1	NSFTV_135	1	Control	10	117733
E1	NSFTV_135	1	Control	11	135672
E1	NSFTV_135	1	Control	12	164129
E1	NSFTV_135	1	Control	13	205296
E1	NSFTV_135	1	Control	14	244774
E1	NSFTV_135	1	Control	15	297580
E1	NSFTV_135	1	Control	16	331153
E1	NSFTV_135	1	Control	17	390531
E1	NSFTV_135	1	Control	18	484799
E1	NSFTV_135	1	Control	19	555118
E1	NSFTV_135	1	Control	2	19914
E1	NSFTV_135	1	Control	20	599027
E1	NSFTV_135	1	Control	3	24896
E1	NSFTV_135	1	Control	4	28826
E1	NSFTV_135	1	Control	5	37666
E1	NSFTV_135	1	Control	6	49257
E1	NSFTV_135	1	Control	7	60807
E1	NSFTV_135	1	Control	8	74784
E1	NSFTV_135	1	Control	9	97215
E1	NSFTV_135	1	Low_water	1	13737
E1	NSFTV_135	1	Low_water	10	80943
E1	NSFTV_135	1	Low_water	11	88297
E1	NSFTV_135	1	Low_water	12	99604
E1	NSFTV_135	1	Low_water	13	111575
E1	NSFTV_135	1	Low_water	14	116492
E1	NSFTV_135	1	Low_water	15	127762
E1	NSFTV_135	1	Low_water	16	140123
E1	NSFTV_135	1	Low_water	17	144306
E1	NSFTV_135	1	Low_water	18	149349
E1	NSFTV_135	1	Low_water	19	153942
E1	NSFTV_135	1	Low_water	2	16767
E1	NSFTV_135	1	Low_water	20	180927
E1	NSFTV_135	1	Low_water	3	22268
E1	NSFTV_135	1	Low_water	4	26152
E1	NSFTV_135	1	Low_water	5	32913
E1	NSFTV_135	1	Low_water	6	41170
E1	NSFTV_135	1	Low_water	7	48342
E1	NSFTV_135	1	Low_water	8	55144
E1	NSFTV_135	1	Low_water	9	67013
E1	NSFTV_139	1	Control	1	13980
E1	NSFTV_139	1	Control	10	90559
E1	NSFTV_139	1	Control	11	103323
E1	NSFTV_139	1	Control	12	125977
E1	NSFTV_139	1	Control	13	139627
E1	NSFTV_139	1	Control	14	157518
E1	NSFTV_139	1	Control	15	173736
E1	NSFTV_139	1	Control	16	195185
E1	NSFTV_139	1	Control	17	206708
E1	NSFTV_139	1	Control	18	231154
E1	NSFTV_139	1	Control	19	251104
E1	NSFTV_139	1	Control	2	16883
E1	NSFTV_139	1	Control	20	279291
E1	NSFTV_139	1	Control	3	21040
E1	NSFTV_139	1	Control	4	27206
E1	NSFTV_139	1	Control	5	33403
E1	NSFTV_139	1	Control	6	43386
E1	NSFTV_139	1	Control	7	57258
E1	NSFTV_139	1	Control	8	70338
E1	NSFTV_139	1	Control	9	77669
E1	NSFTV_139	1	Low_water	1	12927
E1	NSFTV_139	1	Low_water	10	61494
E1	NSFTV_139	1	Low_water	11	67952
E1	NSFTV_139	1	Low_water	12	76527
E1	NSFTV_139	1	Low_water	13	80664
E1	NSFTV_139	1	Low_water	14	84753
E1	NSFTV_139	1	Low_water	15	91855
E1	NSFTV_139	1	Low_water	16	88506
E1	NSFTV_139	1	Low_water	17	90069
E1	NSFTV_139	1	Low_water	18	101724
E1	NSFTV_139	1	Low_water	19	108261
E1	NSFTV_139	1	Low_water	2	15390
E1	NSFTV_139	1	Low_water	20	114553
E1	NSFTV_139	1	Low_water	3	20922
E1	NSFTV_139	1	Low_water	4	25171
E1	NSFTV_139	1	Low_water	5	29800
E1	NSFTV_139	1	Low_water	6	34170
E1	NSFTV_139	1	Low_water	7	41848
E1	NSFTV_139	1	Low_water	8	50433
E1	NSFTV_139	1	Low_water	9	57203
E1	NSFTV_14	1	Control	1	10665
E1	NSFTV_14	1	Control	10	81046
E1	NSFTV_14	1	Control	11	94366
E1	NSFTV_14	1	Control	12	121492
E1	NSFTV_14	1	Control	13	141607
E1	NSFTV_14	1	Control	14	164163
E1	NSFTV_14	1	Control	15	191413
E1	NSFTV_14	1	Control	16	225216
E1	NSFTV_14	1	Control	17	267577
E1	NSFTV_14	1	Control	18	313585
E1	NSFTV_14	1	Control	19	379197
E1	NSFTV_14	1	Control	2	13222
E1	NSFTV_14	1	Control	20	422844
E1	NSFTV_14	1	Control	3	15722
E1	NSFTV_14	1	Control	4	20664
E1	NSFTV_14	1	Control	5	25643
E1	NSFTV_14	1	Control	6	28180
E1	NSFTV_14	1	Control	7	38867
E1	NSFTV_14	1	Control	8	55135
E1	NSFTV_14	1	Control	9	71866
E1	NSFTV_140	1	Control	1	13350
E1	NSFTV_140	1	Control	10	94935
E1	NSFTV_140	1	Control	11	110815
E1	NSFTV_140	1	Control	12	135355
E1	NSFTV_140	1	Control	13	153792
E1	NSFTV_140	1	Control	14	190502
E1	NSFTV_140	1	Control	15	219512
E1	NSFTV_140	1	Control	16	239362
E1	NSFTV_140	1	Control	17	285595
E1	NSFTV_140	1	Control	18	339792
E1	NSFTV_140	1	Control	19	401891
E1	NSFTV_140	1	Control	2	17398
E1	NSFTV_140	1	Control	20	464821
E1	NSFTV_140	1	Control	3	22665
E1	NSFTV_140	1	Control	4	24831
E1	NSFTV_140	1	Control	5	29696
E1	NSFTV_140	1	Control	6	42603
E1	NSFTV_140	1	Control	7	51475
E1	NSFTV_140	1	Control	8	63870
E1	NSFTV_140	1	Control	9	77402
E1	NSFTV_140	1	Low_water	1	13726
E1	NSFTV_140	1	Low_water	10	76330
E1	NSFTV_140	1	Low_water	11	88896
E1	NSFTV_140	1	Low_water	12	114977
E1	NSFTV_140	1	Low_water	13	131333
E1	NSFTV_140	1	Low_water	14	144936
E1	NSFTV_140	1	Low_water	15	157043
E1	NSFTV_140	1	Low_water	16	170260
E1	NSFTV_140	1	Low_water	17	199100
E1	NSFTV_140	1	Low_water	18	230011
E1	NSFTV_140	1	Low_water	19	236109
E1	NSFTV_140	1	Low_water	2	15828
E1	NSFTV_140	1	Low_water	20	237068
E1	NSFTV_140	1	Low_water	3	22162
E1	NSFTV_140	1	Low_water	4	26270
E1	NSFTV_140	1	Low_water	5	30712
E1	NSFTV_140	1	Low_water	6	38721
E1	NSFTV_140	1	Low_water	7	48281
E1	NSFTV_140	1	Low_water	8	59818
E1	NSFTV_140	1	Low_water	9	67989
E1	NSFTV_141	1	Control	1	14789
E1	NSFTV_141	1	Control	10	149098
E1	NSFTV_141	1	Control	11	178882
E1	NSFTV_141	1	Control	12	215904
E1	NSFTV_141	1	Control	13	255745
E1	NSFTV_141	1	Control	14	296818
E1	NSFTV_141	1	Control	15	344182
E1	NSFTV_141	1	Control	16	375042
E1	NSFTV_141	1	Control	17	419405
E1	NSFTV_141	1	Control	18	479566
E1	NSFTV_141	1	Control	19	562328
E1	NSFTV_141	1	Control	2	20686
E1	NSFTV_141	1	Control	20	634788
E1	NSFTV_141	1	Control	3	27702
E1	NSFTV_141	1	Control	4	34577
E1	NSFTV_141	1	Control	5	45448
E1	NSFTV_141	1	Control	6	57560
E1	NSFTV_141	1	Control	7	72221
E1	NSFTV_141	1	Control	8	95685
E1	NSFTV_141	1	Control	9	120600
E1	NSFTV_141	1	Low_water	1	13917
E1	NSFTV_141	1	Low_water	10	121126
E1	NSFTV_141	1	Low_water	11	138278
E1	NSFTV_141	1	Low_water	12	159255
E1	NSFTV_141	1	Low_water	13	178656
E1	NSFTV_141	1	Low_water	14	193618
E1	NSFTV_141	1	Low_water	15	209094
E1	NSFTV_141	1	Low_water	16	214704
E1	NSFTV_141	1	Low_water	17	223336
E1	NSFTV_141	1	Low_water	18	222708
E1	NSFTV_141	1	Low_water	19	226048
E1	NSFTV_141	1	Low_water	2	20095
E1	NSFTV_141	1	Low_water	20	226473
E1	NSFTV_141	1	Low_water	3	25441
E1	NSFTV_141	1	Low_water	4	31781
E1	NSFTV_141	1	Low_water	5	41824
E1	NSFTV_141	1	Low_water	6	51632
E1	NSFTV_141	1	Low_water	7	64898
E1	NSFTV_141	1	Low_water	8	78858
E1	NSFTV_141	1	Low_water	9	100657
E1	NSFTV_142	1	Control	1	14591
E1	NSFTV_142	1	Control	10	104310
E1	NSFTV_142	1	Control	11	120582
E1	NSFTV_142	1	Control	12	142247
E1	NSFTV_142	1	Control	13	162879
E1	NSFTV_142	1	Control	14	195662
E1	NSFTV_142	1	Control	15	231344
E1	NSFTV_142	1	Control	16	264888
E1	NSFTV_142	1	Control	17	312657
E1	NSFTV_142	1	Control	18	368172
E1	NSFTV_142	1	Control	19	424693
E1	NSFTV_142	1	Control	2	19698
E1	NSFTV_142	1	Control	20	487373
E1	NSFTV_142	1	Control	3	25402
E1	NSFTV_142	1	Control	4	31901
E1	NSFTV_142	1	Control	5	43482
E1	NSFTV_142	1	Control	6	50925
E1	NSFTV_142	1	Control	7	58766
E1	NSFTV_142	1	Control	8	78215
E1	NSFTV_142	1	Control	9	97810
E1	NSFTV_142	1	Low_water	1	18796
E1	NSFTV_142	1	Low_water	10	103078
E1	NSFTV_142	1	Low_water	11	111507
E1	NSFTV_142	1	Low_water	12	118873
E1	NSFTV_142	1	Low_water	13	126278
E1	NSFTV_142	1	Low_water	14	130903
E1	NSFTV_142	1	Low_water	15	137632
E1	NSFTV_142	1	Low_water	16	132568
E1	NSFTV_142	1	Low_water	17	127168
E1	NSFTV_142	1	Low_water	18	137924
E1	NSFTV_142	1	Low_water	19	133604
E1	NSFTV_142	1	Low_water	2	24274
E1	NSFTV_142	1	Low_water	20	151186
E1	NSFTV_142	1	Low_water	3	29721
E1	NSFTV_142	1	Low_water	4	36840
E1	NSFTV_142	1	Low_water	5	46652
E1	NSFTV_142	1	Low_water	6	54507
E1	NSFTV_142	1	Low_water	7	64139
E1	NSFTV_142	1	Low_water	8	78361
E1	NSFTV_142	1	Low_water	9	93523
E1	NSFTV_143	1	Control	1	9000
E1	NSFTV_143	1	Control	10	74336
E1	NSFTV_143	1	Control	11	87677
E1	NSFTV_143	1	Control	12	105139
E1	NSFTV_143	1	Control	13	134889
E1	NSFTV_143	1	Control	14	152154
E1	NSFTV_143	1	Control	15	174168
E1	NSFTV_143	1	Control	16	194513
E1	NSFTV_143	1	Control	17	235776
E1	NSFTV_143	1	Control	18	295073
E1	NSFTV_143	1	Control	19	351094
E1	NSFTV_143	1	Control	2	11328
E1	NSFTV_143	1	Control	20	395353
E1	NSFTV_143	1	Control	3	15444
E1	NSFTV_143	1	Control	4	19483
E1	NSFTV_143	1	Control	5	23931
E1	NSFTV_143	1	Control	6	32154
E1	NSFTV_143	1	Control	7	37888
E1	NSFTV_143	1	Control	8	50104
E1	NSFTV_143	1	Control	9	66581
E1	NSFTV_143	1	Low_water	1	11220
E1	NSFTV_143	1	Low_water	10	84199
E1	NSFTV_143	1	Low_water	11	95986
E1	NSFTV_143	1	Low_water	12	107653
E1	NSFTV_143	1	Low_water	13	127325
E1	NSFTV_143	1	Low_water	14	142445
E1	NSFTV_143	1	Low_water	15	168398
E1	NSFTV_143	1	Low_water	16	173909
E1	NSFTV_143	1	Low_water	17	181918
E1	NSFTV_143	1	Low_water	18	186223
E1	NSFTV_143	1	Low_water	19	188995
E1	NSFTV_143	1	Low_water	2	14409
E1	NSFTV_143	1	Low_water	20	192458
E1	NSFTV_143	1	Low_water	3	18374
E1	NSFTV_143	1	Low_water	4	22227
E1	NSFTV_143	1	Low_water	5	28099
E1	NSFTV_143	1	Low_water	6	34791
E1	NSFTV_143	1	Low_water	7	42380
E1	NSFTV_143	1	Low_water	8	54363
E1	NSFTV_143	1	Low_water	9	70938
E1	NSFTV_144	1	Control	1	7146
E1	NSFTV_144	1	Control	10	58727
E1	NSFTV_144	1	Control	11	71116
E1	NSFTV_144	1	Control	12	77403
E1	NSFTV_144	1	Control	13	92399
E1	NSFTV_144	1	Control	14	112758
E1	NSFTV_144	1	Control	15	138387
E1	NSFTV_144	1	Control	16	157993
E1	NSFTV_144	1	Control	17	175309
E1	NSFTV_144	1	Control	18	216669
E1	NSFTV_144	1	Control	19	258732
E1	NSFTV_144	1	Control	2	9245
E1	NSFTV_144	1	Control	20	289239
E1	NSFTV_144	1	Control	3	12537
E1	NSFTV_144	1	Control	4	14651
E1	NSFTV_144	1	Control	5	17983
E1	NSFTV_144	1	Control	6	22913
E1	NSFTV_144	1	Control	7	29069
E1	NSFTV_144	1	Control	8	35519
E1	NSFTV_144	1	Control	9	45898
E1	NSFTV_144	1	Low_water	1	8517
E1	NSFTV_144	1	Low_water	10	60259
E1	NSFTV_144	1	Low_water	11	72668
E1	NSFTV_144	1	Low_water	12	81101
E1	NSFTV_144	1	Low_water	13	91606
E1	NSFTV_144	1	Low_water	14	104006
E1	NSFTV_144	1	Low_water	15	130769
E1	NSFTV_144	1	Low_water	16	148476
E1	NSFTV_144	1	Low_water	17	154194
E1	NSFTV_144	1	Low_water	18	169972
E1	NSFTV_144	1	Low_water	19	183213
E1	NSFTV_144	1	Low_water	2	10426
E1	NSFTV_144	1	Low_water	20	193624
E1	NSFTV_144	1	Low_water	3	12550
E1	NSFTV_144	1	Low_water	4	15360
E1	NSFTV_144	1	Low_water	5	19608
E1	NSFTV_144	1	Low_water	6	24296
E1	NSFTV_144	1	Low_water	7	29728
E1	NSFTV_144	1	Low_water	8	35883
E1	NSFTV_144	1	Low_water	9	44705
E1	NSFTV_145	1	Control	1	19771
E1	NSFTV_145	1	Control	10	119878
E1	NSFTV_145	1	Control	11	131328
E1	NSFTV_145	1	Control	12	147981
E1	NSFTV_145	1	Control	13	164186
E1	NSFTV_145	1	Control	14	195016
E1	NSFTV_145	1	Control	15	218409
E1	NSFTV_145	1	Control	16	240520
E1	NSFTV_145	1	Control	17	294823
E1	NSFTV_145	1	Control	18	343911
E1	NSFTV_145	1	Control	19	374877
E1	NSFTV_145	1	Control	2	21272
E1	NSFTV_145	1	Control	20	436228
E1	NSFTV_145	1	Control	3	30664
E1	NSFTV_145	1	Control	4	34200
E1	NSFTV_145	1	Control	5	40536
E1	NSFTV_145	1	Control	6	52211
E1	NSFTV_145	1	Control	7	69856
E1	NSFTV_145	1	Control	8	85647
E1	NSFTV_145	1	Control	9	102803
E1	NSFTV_145	1	Low_water	1	14062
E1	NSFTV_145	1	Low_water	10	85926
E1	NSFTV_145	1	Low_water	11	97052
E1	NSFTV_145	1	Low_water	12	104132
E1	NSFTV_145	1	Low_water	13	111718
E1	NSFTV_145	1	Low_water	14	113164
E1	NSFTV_145	1	Low_water	15	120463
E1	NSFTV_145	1	Low_water	16	121683
E1	NSFTV_145	1	Low_water	17	120428
E1	NSFTV_145	1	Low_water	18	131511
E1	NSFTV_145	1	Low_water	19	131880
E1	NSFTV_145	1	Low_water	2	19347
E1	NSFTV_145	1	Low_water	20	148166
E1	NSFTV_145	1	Low_water	3	28011
E1	NSFTV_145	1	Low_water	4	32580
E1	NSFTV_145	1	Low_water	5	40003
E1	NSFTV_145	1	Low_water	6	48112
E1	NSFTV_145	1	Low_water	7	59273
E1	NSFTV_145	1	Low_water	8	74774
E1	NSFTV_145	1	Low_water	9	83028
E1	NSFTV_146	1	Control	1	12979
E1	NSFTV_146	1	Control	10	103104
E1	NSFTV_146	1	Control	11	115491
E1	NSFTV_146	1	Control	12	146904
E1	NSFTV_146	1	Control	13	191232
E1	NSFTV_146	1	Control	14	223169
E1	NSFTV_146	1	Control	15	263662
E1	NSFTV_146	1	Control	16	303872
E1	NSFTV_146	1	Control	17	371420
E1	NSFTV_146	1	Control	18	456865
E1	NSFTV_146	1	Control	19	512269
E1	NSFTV_146	1	Control	2	16489
E1	NSFTV_146	1	Control	20	571674
E1	NSFTV_146	1	Control	3	21191
E1	NSFTV_146	1	Control	4	30772
E1	NSFTV_146	1	Control	5	36966
E1	NSFTV_146	1	Control	6	47644
E1	NSFTV_146	1	Control	7	61600
E1	NSFTV_146	1	Control	8	77832
E1	NSFTV_146	1	Control	9	87621
E1	NSFTV_146	1	Low_water	1	14833
E1	NSFTV_146	1	Low_water	10	107812
E1	NSFTV_146	1	Low_water	11	134152
E1	NSFTV_146	1	Low_water	12	152887
E1	NSFTV_146	1	Low_water	13	167124
E1	NSFTV_146	1	Low_water	14	174510
E1	NSFTV_146	1	Low_water	15	180452
E1	NSFTV_146	1	Low_water	16	187395
E1	NSFTV_146	1	Low_water	17	190073
E1	NSFTV_146	1	Low_water	18	190786
E1	NSFTV_146	1	Low_water	19	197790
E1	NSFTV_146	1	Low_water	2	17733
E1	NSFTV_146	1	Low_water	20	205691
E1	NSFTV_146	1	Low_water	3	21882
E1	NSFTV_146	1	Low_water	4	30529
E1	NSFTV_146	1	Low_water	5	38388
E1	NSFTV_146	1	Low_water	6	46562
E1	NSFTV_146	1	Low_water	7	61296
E1	NSFTV_146	1	Low_water	8	77450
E1	NSFTV_146	1	Low_water	9	92586
E1	NSFTV_147	1	Control	1	8001
E1	NSFTV_147	1	Control	10	70934
E1	NSFTV_147	1	Control	11	86818
E1	NSFTV_147	1	Control	12	98841
E1	NSFTV_147	1	Control	13	116850
E1	NSFTV_147	1	Control	14	129373
E1	NSFTV_147	1	Control	15	158303
E1	NSFTV_147	1	Control	16	179703
E1	NSFTV_147	1	Control	17	205274
E1	NSFTV_147	1	Control	18	240237
E1	NSFTV_147	1	Control	19	293584
E1	NSFTV_147	1	Control	2	10760
E1	NSFTV_147	1	Control	20	336437
E1	NSFTV_147	1	Control	3	15323
E1	NSFTV_147	1	Control	4	18481
E1	NSFTV_147	1	Control	5	21662
E1	NSFTV_147	1	Control	6	27222
E1	NSFTV_147	1	Control	7	36528
E1	NSFTV_147	1	Control	8	44909
E1	NSFTV_147	1	Control	9	51959
E1	NSFTV_147	1	Low_water	1	8190
E1	NSFTV_147	1	Low_water	10	57007
E1	NSFTV_147	1	Low_water	11	67370
E1	NSFTV_147	1	Low_water	12	80032
E1	NSFTV_147	1	Low_water	13	90288
E1	NSFTV_147	1	Low_water	14	94589
E1	NSFTV_147	1	Low_water	15	110656
E1	NSFTV_147	1	Low_water	16	124064
E1	NSFTV_147	1	Low_water	17	140492
E1	NSFTV_147	1	Low_water	18	147059
E1	NSFTV_147	1	Low_water	19	151725
E1	NSFTV_147	1	Low_water	2	10623
E1	NSFTV_147	1	Low_water	20	157771
E1	NSFTV_147	1	Low_water	3	15307
E1	NSFTV_147	1	Low_water	4	19047
E1	NSFTV_147	1	Low_water	5	20248
E1	NSFTV_147	1	Low_water	6	25973
E1	NSFTV_147	1	Low_water	7	32735
E1	NSFTV_147	1	Low_water	8	41424
E1	NSFTV_147	1	Low_water	9	46857
E1	NSFTV_148	1	Control	1	18750
E1	NSFTV_148	1	Control	10	132072
E1	NSFTV_148	1	Control	11	158752
E1	NSFTV_148	1	Control	12	188729
E1	NSFTV_148	1	Control	13	217131
E1	NSFTV_148	1	Control	14	254532
E1	NSFTV_148	1	Control	15	290365
E1	NSFTV_148	1	Control	16	338621
E1	NSFTV_148	1	Control	17	388694
E1	NSFTV_148	1	Control	18	422847
E1	NSFTV_148	1	Control	19	487341
E1	NSFTV_148	1	Control	2	26295
E1	NSFTV_148	1	Control	20	534036
E1	NSFTV_148	1	Control	3	32254
E1	NSFTV_148	1	Control	4	39914
E1	NSFTV_148	1	Control	5	53313
E1	NSFTV_148	1	Control	6	62402
E1	NSFTV_148	1	Control	7	71321
E1	NSFTV_148	1	Control	8	88791
E1	NSFTV_148	1	Control	9	110126
E1	NSFTV_148	1	Low_water	1	25587
E1	NSFTV_148	1	Low_water	10	117537
E1	NSFTV_148	1	Low_water	11	122089
E1	NSFTV_148	1	Low_water	12	131642
E1	NSFTV_148	1	Low_water	13	134454
E1	NSFTV_148	1	Low_water	14	136936
E1	NSFTV_148	1	Low_water	15	137945
E1	NSFTV_148	1	Low_water	16	135257
E1	NSFTV_148	1	Low_water	17	129144
E1	NSFTV_148	1	Low_water	18	135842
E1	NSFTV_148	1	Low_water	19	140167
E1	NSFTV_148	1	Low_water	2	30573
E1	NSFTV_148	1	Low_water	20	145626
E1	NSFTV_148	1	Low_water	3	37122
E1	NSFTV_148	1	Low_water	4	46698
E1	NSFTV_148	1	Low_water	5	59906
E1	NSFTV_148	1	Low_water	6	67022
E1	NSFTV_148	1	Low_water	7	77264
E1	NSFTV_148	1	Low_water	8	90522
E1	NSFTV_148	1	Low_water	9	107330
E1	NSFTV_149	1	Control	1	18338
E1	NSFTV_149	1	Control	10	105958
E1	NSFTV_149	1	Control	11	127837
E1	NSFTV_149	1	Control	12	155121
E1	NSFTV_149	1	Control	13	173786
E1	NSFTV_149	1	Control	14	206710
E1	NSFTV_149	1	Control	15	240745
E1	NSFTV_149	1	Control	16	272854
E1	NSFTV_149	1	Control	17	301934
E1	NSFTV_149	1	Control	18	334352
E1	NSFTV_149	1	Control	19	377373
E1	NSFTV_149	1	Control	2	21419
E1	NSFTV_149	1	Control	20	427353
E1	NSFTV_149	1	Control	3	26171
E1	NSFTV_149	1	Control	4	30559
E1	NSFTV_149	1	Control	5	43111
E1	NSFTV_149	1	Control	6	49193
E1	NSFTV_149	1	Control	7	60259
E1	NSFTV_149	1	Control	8	79813
E1	NSFTV_149	1	Control	9	91467
E1	NSFTV_149	1	Low_water	1	17487
E1	NSFTV_149	1	Low_water	10	73908
E1	NSFTV_149	1	Low_water	11	79030
E1	NSFTV_149	1	Low_water	12	79714
E1	NSFTV_149	1	Low_water	13	91093
E1	NSFTV_149	1	Low_water	14	99632
E1	NSFTV_149	1	Low_water	15	110210
E1	NSFTV_149	1	Low_water	16	116518
E1	NSFTV_149	1	Low_water	17	120669
E1	NSFTV_149	1	Low_water	18	121075
E1	NSFTV_149	1	Low_water	19	120164
E1	NSFTV_149	1	Low_water	2	19491
E1	NSFTV_149	1	Low_water	20	127481
E1	NSFTV_149	1	Low_water	3	23383
E1	NSFTV_149	1	Low_water	4	31542
E1	NSFTV_149	1	Low_water	5	35483
E1	NSFTV_149	1	Low_water	6	40655
E1	NSFTV_149	1	Low_water	7	46047
E1	NSFTV_149	1	Low_water	8	61684
E1	NSFTV_149	1	Low_water	9	67780
E1	NSFTV_15	1	Control	1	10696
E1	NSFTV_15	1	Control	10	71427
E1	NSFTV_15	1	Control	11	88939
E1	NSFTV_15	1	Control	12	104225
E1	NSFTV_15	1	Control	13	118488
E1	NSFTV_15	1	Control	14	130029
E1	NSFTV_15	1	Control	15	154387
E1	NSFTV_15	1	Control	16	181341
E1	NSFTV_15	1	Control	17	210351
E1	NSFTV_15	1	Control	18	233312
E1	NSFTV_15	1	Control	19	260267
E1	NSFTV_15	1	Control	2	13487
E1	NSFTV_15	1	Control	20	308237
E1	NSFTV_15	1	Control	3	15477
E1	NSFTV_15	1	Control	4	18739
E1	NSFTV_15	1	Control	5	24912
E1	NSFTV_15	1	Control	6	31171
E1	NSFTV_15	1	Control	7	38343
E1	NSFTV_15	1	Control	8	47547
E1	NSFTV_15	1	Control	9	61575
E1	NSFTV_15	1	Low_water	1	8058
E1	NSFTV_15	1	Low_water	10	46693
E1	NSFTV_15	1	Low_water	11	48337
E1	NSFTV_15	1	Low_water	12	51066
E1	NSFTV_15	1	Low_water	13	56819
E1	NSFTV_15	1	Low_water	14	59418
E1	NSFTV_15	1	Low_water	15	65206
E1	NSFTV_15	1	Low_water	16	64815
E1	NSFTV_15	1	Low_water	17	67898
E1	NSFTV_15	1	Low_water	18	71034
E1	NSFTV_15	1	Low_water	19	71808
E1	NSFTV_15	1	Low_water	2	9725
E1	NSFTV_15	1	Low_water	20	79580
E1	NSFTV_15	1	Low_water	3	13772
E1	NSFTV_15	1	Low_water	4	16060
E1	NSFTV_15	1	Low_water	5	18591
E1	NSFTV_15	1	Low_water	6	27756
E1	NSFTV_15	1	Low_water	7	34378
E1	NSFTV_15	1	Low_water	8	40509
E1	NSFTV_15	1	Low_water	9	43041
E1	NSFTV_150	1	Control	1	12378
E1	NSFTV_150	1	Control	10	73068
E1	NSFTV_150	1	Control	11	86015
E1	NSFTV_150	1	Control	12	97972
E1	NSFTV_150	1	Control	13	111128
E1	NSFTV_150	1	Control	14	134660
E1	NSFTV_150	1	Control	15	161598
E1	NSFTV_150	1	Control	16	177455
E1	NSFTV_150	1	Control	17	208674
E1	NSFTV_150	1	Control	18	244085
E1	NSFTV_150	1	Control	19	267343
E1	NSFTV_150	1	Control	2	15537
E1	NSFTV_150	1	Control	20	302985
E1	NSFTV_150	1	Control	3	19657
E1	NSFTV_150	1	Control	4	22988
E1	NSFTV_150	1	Control	5	27458
E1	NSFTV_150	1	Control	6	32633
E1	NSFTV_150	1	Control	7	40972
E1	NSFTV_150	1	Control	8	51395
E1	NSFTV_150	1	Control	9	61567
E1	NSFTV_150	1	Low_water	1	12420
E1	NSFTV_150	1	Low_water	10	60996
E1	NSFTV_150	1	Low_water	11	73328
E1	NSFTV_150	1	Low_water	12	85181
E1	NSFTV_150	1	Low_water	13	97314
E1	NSFTV_150	1	Low_water	14	114048
E1	NSFTV_150	1	Low_water	15	135981
E1	NSFTV_150	1	Low_water	16	151996
E1	NSFTV_150	1	Low_water	17	182222
E1	NSFTV_150	1	Low_water	18	206844
E1	NSFTV_150	1	Low_water	19	212020
E1	NSFTV_150	1	Low_water	2	14266
E1	NSFTV_150	1	Low_water	20	224717
E1	NSFTV_150	1	Low_water	3	18381
E1	NSFTV_150	1	Low_water	4	22757
E1	NSFTV_150	1	Low_water	5	25917
E1	NSFTV_150	1	Low_water	6	30839
E1	NSFTV_150	1	Low_water	7	36920
E1	NSFTV_150	1	Low_water	8	44028
E1	NSFTV_150	1	Low_water	9	52790
E1	NSFTV_151	1	Control	1	8640
E1	NSFTV_151	1	Control	10	70754
E1	NSFTV_151	1	Control	11	82371
E1	NSFTV_151	1	Control	12	93496
E1	NSFTV_151	1	Control	13	113816
E1	NSFTV_151	1	Control	14	133813
E1	NSFTV_151	1	Control	15	159395
E1	NSFTV_151	1	Control	16	179663
E1	NSFTV_151	1	Control	17	207955
E1	NSFTV_151	1	Control	18	256275
E1	NSFTV_151	1	Control	19	287356
E1	NSFTV_151	1	Control	2	10458
E1	NSFTV_151	1	Control	20	311535
E1	NSFTV_151	1	Control	3	13799
E1	NSFTV_151	1	Control	4	16351
E1	NSFTV_151	1	Control	5	20562
E1	NSFTV_151	1	Control	6	25969
E1	NSFTV_151	1	Control	7	32878
E1	NSFTV_151	1	Control	8	39539
E1	NSFTV_151	1	Control	9	53100
E1	NSFTV_151	1	Low_water	1	8277
E1	NSFTV_151	1	Low_water	10	52238
E1	NSFTV_151	1	Low_water	11	68779
E1	NSFTV_151	1	Low_water	12	85162
E1	NSFTV_151	1	Low_water	13	91811
E1	NSFTV_151	1	Low_water	14	100566
E1	NSFTV_151	1	Low_water	15	112169
E1	NSFTV_151	1	Low_water	16	123884
E1	NSFTV_151	1	Low_water	17	136711
E1	NSFTV_151	1	Low_water	18	153667
E1	NSFTV_151	1	Low_water	19	165566
E1	NSFTV_151	1	Low_water	2	9711
E1	NSFTV_151	1	Low_water	20	184112
E1	NSFTV_151	1	Low_water	3	11702
E1	NSFTV_151	1	Low_water	4	14639
E1	NSFTV_151	1	Low_water	5	17586
E1	NSFTV_151	1	Low_water	6	22827
E1	NSFTV_151	1	Low_water	7	30900
E1	NSFTV_151	1	Low_water	8	37874
E1	NSFTV_151	1	Low_water	9	41407
E1	NSFTV_152	1	Control	1	13255
E1	NSFTV_152	1	Control	10	110382
E1	NSFTV_152	1	Control	11	125694
E1	NSFTV_152	1	Control	12	150325
E1	NSFTV_152	1	Control	13	181402
E1	NSFTV_152	1	Control	14	212699
E1	NSFTV_152	1	Control	15	250334
E1	NSFTV_152	1	Control	16	274645
E1	NSFTV_152	1	Control	17	325666
E1	NSFTV_152	1	Control	18	377996
E1	NSFTV_152	1	Control	19	425668
E1	NSFTV_152	1	Control	2	18177
E1	NSFTV_152	1	Control	20	497819
E1	NSFTV_152	1	Control	3	23309
E1	NSFTV_152	1	Control	4	26992
E1	NSFTV_152	1	Control	5	36403
E1	NSFTV_152	1	Control	6	47703
E1	NSFTV_152	1	Control	7	55978
E1	NSFTV_152	1	Control	8	72870
E1	NSFTV_152	1	Control	9	90286
E1	NSFTV_152	1	Low_water	1	18289
E1	NSFTV_152	1	Low_water	10	78302
E1	NSFTV_152	1	Low_water	11	89497
E1	NSFTV_152	1	Low_water	12	95099
E1	NSFTV_152	1	Low_water	13	100840
E1	NSFTV_152	1	Low_water	14	107633
E1	NSFTV_152	1	Low_water	15	108994
E1	NSFTV_152	1	Low_water	16	111941
E1	NSFTV_152	1	Low_water	17	115495
E1	NSFTV_152	1	Low_water	18	121654
E1	NSFTV_152	1	Low_water	19	117791
E1	NSFTV_152	1	Low_water	2	21802
E1	NSFTV_152	1	Low_water	20	128035
E1	NSFTV_152	1	Low_water	3	28963
E1	NSFTV_152	1	Low_water	4	31658
E1	NSFTV_152	1	Low_water	5	35678
E1	NSFTV_152	1	Low_water	6	43944
E1	NSFTV_152	1	Low_water	7	52630
E1	NSFTV_152	1	Low_water	8	58448
E1	NSFTV_152	1	Low_water	9	69984
E1	NSFTV_153	1	Control	1	12192
E1	NSFTV_153	1	Control	10	93347
E1	NSFTV_153	1	Control	11	111739
E1	NSFTV_153	1	Control	12	135685
E1	NSFTV_153	1	Control	13	160889
E1	NSFTV_153	1	Control	14	177303
E1	NSFTV_153	1	Control	15	202115
E1	NSFTV_153	1	Control	16	223404
E1	NSFTV_153	1	Control	17	272157
E1	NSFTV_153	1	Control	18	317234
E1	NSFTV_153	1	Control	19	338541
E1	NSFTV_153	1	Control	2	15131
E1	NSFTV_153	1	Control	20	403941
E1	NSFTV_153	1	Control	3	18601
E1	NSFTV_153	1	Control	4	23009
E1	NSFTV_153	1	Control	5	29604
E1	NSFTV_153	1	Control	6	38220
E1	NSFTV_153	1	Control	7	47094
E1	NSFTV_153	1	Control	8	62846
E1	NSFTV_153	1	Control	9	77381
E1	NSFTV_153	1	Low_water	1	12500
E1	NSFTV_153	1	Low_water	10	71308
E1	NSFTV_153	1	Low_water	11	80923
E1	NSFTV_153	1	Low_water	12	89696
E1	NSFTV_153	1	Low_water	13	97303
E1	NSFTV_153	1	Low_water	14	104641
E1	NSFTV_153	1	Low_water	15	118071
E1	NSFTV_153	1	Low_water	16	126826
E1	NSFTV_153	1	Low_water	17	132051
E1	NSFTV_153	1	Low_water	18	136397
E1	NSFTV_153	1	Low_water	19	145477
E1	NSFTV_153	1	Low_water	2	15512
E1	NSFTV_153	1	Low_water	20	158818
E1	NSFTV_153	1	Low_water	3	19673
E1	NSFTV_153	1	Low_water	4	23464
E1	NSFTV_153	1	Low_water	5	29451
E1	NSFTV_153	1	Low_water	6	35849
E1	NSFTV_153	1	Low_water	7	43712
E1	NSFTV_153	1	Low_water	8	52784
E1	NSFTV_153	1	Low_water	9	61959
E1	NSFTV_154	1	Control	1	14706
E1	NSFTV_154	1	Control	10	106893
E1	NSFTV_154	1	Control	11	139009
E1	NSFTV_154	1	Control	12	165634
E1	NSFTV_154	1	Control	13	192494
E1	NSFTV_154	1	Control	14	224588
E1	NSFTV_154	1	Control	15	272956
E1	NSFTV_154	1	Control	16	312119
E1	NSFTV_154	1	Control	17	350320
E1	NSFTV_154	1	Control	18	389528
E1	NSFTV_154	1	Control	19	433606
E1	NSFTV_154	1	Control	2	16653
E1	NSFTV_154	1	Control	20	504587
E1	NSFTV_154	1	Control	3	21592
E1	NSFTV_154	1	Control	4	26323
E1	NSFTV_154	1	Control	5	35884
E1	NSFTV_154	1	Control	6	44304
E1	NSFTV_154	1	Control	7	57860
E1	NSFTV_154	1	Control	8	74301
E1	NSFTV_154	1	Control	9	88328
E1	NSFTV_154	1	Low_water	1	15955
E1	NSFTV_154	1	Low_water	10	83682
E1	NSFTV_154	1	Low_water	11	96509
E1	NSFTV_154	1	Low_water	12	106948
E1	NSFTV_154	1	Low_water	13	123951
E1	NSFTV_154	1	Low_water	14	135810
E1	NSFTV_154	1	Low_water	15	141231
E1	NSFTV_154	1	Low_water	16	150106
E1	NSFTV_154	1	Low_water	17	150822
E1	NSFTV_154	1	Low_water	18	153125
E1	NSFTV_154	1	Low_water	19	158263
E1	NSFTV_154	1	Low_water	2	16662
E1	NSFTV_154	1	Low_water	20	163236
E1	NSFTV_154	1	Low_water	3	21331
E1	NSFTV_154	1	Low_water	4	26478
E1	NSFTV_154	1	Low_water	5	32587
E1	NSFTV_154	1	Low_water	6	38783
E1	NSFTV_154	1	Low_water	7	47311
E1	NSFTV_154	1	Low_water	8	65926
E1	NSFTV_154	1	Low_water	9	77220
E1	NSFTV_155	1	Control	1	17709
E1	NSFTV_155	1	Control	10	141747
E1	NSFTV_155	1	Control	11	168848
E1	NSFTV_155	1	Control	12	190097
E1	NSFTV_155	1	Control	13	224096
E1	NSFTV_155	1	Control	14	264138
E1	NSFTV_155	1	Control	15	306355
E1	NSFTV_155	1	Control	16	352756
E1	NSFTV_155	1	Control	17	400921
E1	NSFTV_155	1	Control	18	431657
E1	NSFTV_155	1	Control	19	502320
E1	NSFTV_155	1	Control	2	21745
E1	NSFTV_155	1	Control	20	566687
E1	NSFTV_155	1	Control	3	31737
E1	NSFTV_155	1	Control	4	40400
E1	NSFTV_155	1	Control	5	47069
E1	NSFTV_155	1	Control	6	63295
E1	NSFTV_155	1	Control	7	83318
E1	NSFTV_155	1	Control	8	98909
[truncated: 46,287 more rows]
